# Supplementary material for: Synthesis of new asymmetric substituted boron amidines – reactions with CO and transfer hydrogenations of phenylacetylene
Source: Royal Society of Chemistry journal article supplement (doi:10.1039/c5dt01966d), 2015-01-01
Supplement: c5dt01966d1.pdf [file c5dt01966d1.pdf]

## *Electronic Supplementary Information*

### **Synthesis of new asymmetric substituted boron amidines - Reactions with CO and transfer hydrogenations of phenylacetylene**

*Alan R. Cabrera,<sup>a</sup> Rene S. Rojas,<sup>a,\*</sup> Mauricio Valderrama,<sup>a</sup> Pascal Plüss,<sup>b</sup> Heinz Berke,<sup>b</sup> Constantin Daniliuc,<sup>c</sup> Gerald Kehr,<sup>c</sup> Gerhard Erker.<sup>c,\*</sup>*

---

<sup>a</sup> Nucleus Millennium of Chemical Processes and Catalysis, Departamento de Química Inorgánica, Facultad de Química, Pontificia Universidad Católica de Chile, Casilla 306, Santiago, Chile. <sup>b</sup> Chemisches Institut, Universität Zürich, Winterthurerstrasse 190, CH-8057 Zürich, Switzerland. <sup>c</sup> Organisch-Chemisches Institut, Westfälische Wilhelms-Universität, Corrensstrasse 40, D-48149 Münster, Germany.

## Experimental Section

General Remarks. All manipulations were performed under an inert atmosphere using standard glovebox and Schlenk-line techniques. All reagents were used as received from *Aldrich* unless otherwise specified. Toluene and pentane were distilled from benzophenone ketyl. The following instruments were used for the physical characterization of the compounds. NMR: *Varian Inova* 500 ( $^1\text{H}$ : 500 MHz,  $^{13}\text{C}$ : 126 MHz,  $^{19}\text{F}$ : 470 MHz,  $^{11}\text{B}$ : 160 MHz), *Bruker Unity Plus* 600 ( $^1\text{H}$ : 600 MHz,  $^{31}\text{C}$ : 151 MHz,  $^{19}\text{F}$ : 564 MHz,  $^{11}\text{B}$ : 64 MHz) and *Bruker Advance 400*. Most NMR assignments were supported by additional 2D experiments. FT-IR spectra were recorded on a Bruker Vector-22 Spectrophotometer using KBr pellets. X-ray crystal structure analyses: Data sets were collected with Nonius KappaCCD diffractometers, in case of Mo-radiation equipped with a rotating anode generator. Programs used: data collection COLLECT (Nonius B.V., 1998), data reduction Denzo-SMN (Z. Otwinowski, W. Minor, *Methods in Enzymology*, **1997**, 276, 307-326), absorption correction SORTAV (R.H. Blessing, *Acta Cryst.* **1995**, A51, 33-37; R.H. Blessing, *J. Appl. Cryst.* **1997**, 30, 421-426) and Denzo (Z. Otwinowski, D. Borek, W. Majewski, W. Minor, *Acta Cryst.* **2003**, A59, 228-234), structure solution SHELXS-97 (G.M. Sheldrick, *Acta Cryst.* **1990**, A46, 467-473), structure refinement SHELXL-97 (G.M. Sheldrick, *Acta Cryst.* **2008**, A64, 112-122), graphics XP (BrukerAXS, 2000) and SCHAKAL (E. Keller, 1997). *R*-values are given for the observed reflections,  $wR^2$ -values for all.

CCDC 1051038 - 1051040 contain the supplementary crystallographic data for this paper. These data can be obtained free of charge at [www.ccdc.cam.ac.uk/conts/retrieving.html](http://www.ccdc.cam.ac.uk/conts/retrieving.html) [or from the Cambridge Crystallographic Data Centre, 12 Union Road, Cambridge CB2 1EZ, UK; fax: (internat.) +44(1223)336-033, E-mail: deposit@ccdc.cam.ac.uk].

## Synthesis and Characterization of Compounds.

### N'-(2,6-diisopropylphenyl)-N-(4-cyanophenyl)acetimidamide. (**1b**)

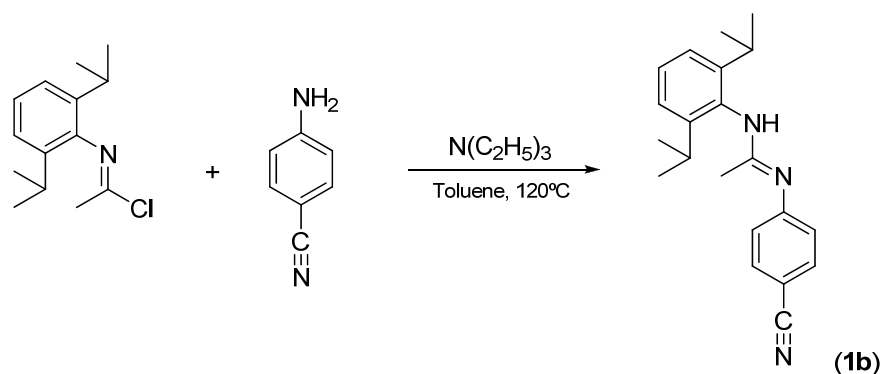

N-(2,6-diisopropylphenyl)acetimidoylchloride <sup>[1]</sup> (1.11 g; 4.7 mmol) and NEt<sub>3</sub> (0.7 ml) was added to a solution of 4-aminobenzonitrile (0.55 g; 4.7 mmol) in anhydrous toluene (40 ml). The mixture was refluxed for 3 h with vigorous stirring. The white precipitated (Et<sub>3</sub>NHCl) formed was removed by filtration and the yellow solution was evaporated under vacuum to dryness. The crude product was washed with cold toluene and recrystallized from methanol. Compound (**1b**) was isolated as white solid in (70%) yield (1.04 g; 3.3 mmol).

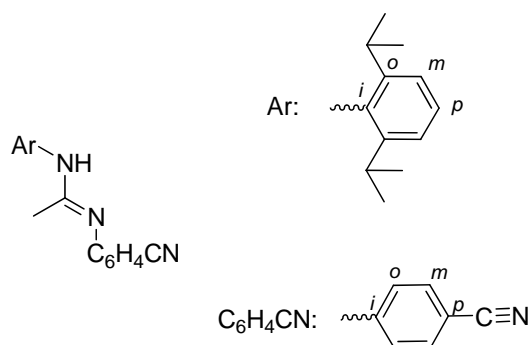

<sup>1</sup>H NMR (400 MHz, C<sub>7</sub>D<sub>8</sub>, 298 K): δ/ppm = 7.48 (d, *J* = 8.6Hz, 2H, *m*-C<sub>6</sub>H<sub>4</sub>CN), 7.12 (d, *J* = 6.9Hz, 2H, *m*-Ar), 7.09 (m, 1H, *p*-Ar), 7.05 (d, *J* = 8.6Hz, 2H, *o*-C<sub>6</sub>H<sub>4</sub>CN), 5.83 (br., 1H, NH), 2.95 (hept, *J* = 6.9Hz, 2H, H*Ci*Pr), 1.33 (s, 3H, MeC), 1.18 (d, *J* = 6.9 Hz, 6H, Me*i*Pr), 1.15 (d, *J* = 6.9 Hz, 6H, Me*i*Pr').

<sup>13</sup>C{<sup>1</sup>H} NMR (100 MHz, C<sub>7</sub>D<sub>8</sub>, 298 K): δ/ppm = 151.7 (<sup>Ar-N</sup>C<sup>N-C<sub>6</sub>H<sub>4</sub>CN</sup>), 145.1 (*i*-Ar), 144.8 (*i*-C<sub>6</sub>H<sub>4</sub>CN), 138.1 (*o*-Ar), 133.0 (*o*-C<sub>6</sub>H<sub>4</sub>CN), 123.8 (*p*-Ar), 123.4 (*m*-Ar), 119.3 (*p*-C<sub>6</sub>H<sub>4</sub>CN), 118.7 (*m*-C<sub>6</sub>H<sub>4</sub>CN), 105.3 (C≡N), 28.6 (H*Ci*Pr), 23.8 (Me*i*Pr'), 23.0 (Me*i*Pr), 18.3 (MeC).

**<sup>1</sup>H, <sup>13</sup>C-GHMBC** (400 MHz / 100 MHz, C<sub>7</sub>D<sub>8</sub>, 298 K): δ (<sup>1</sup>H) / δ (<sup>13</sup>C) = 7.48 / 144.8, 105.3 (*m*-C<sub>6</sub>H<sub>4</sub>CN / *i*-C<sub>6</sub>H<sub>4</sub>CN, C≡N), 7.12 / 145.1, 28.6 (*m*-Ar / *i*-Ar, HClPr), 7.05 / 144.8, 119.3 (*i*-C<sub>6</sub>H<sub>4</sub>CN / *p*-C<sub>6</sub>H<sub>4</sub>CN), 2.95 / 145.1, 138.1, 123.8, 23.8, 23.0 (HClPr / *i*-Ar, *o*-Ar, *m*-Ar, MeIPr', MeIPr), 1.33 / 151.7 (MeC / <sup>Ar-N</sup>C<sup>N-C<sub>6</sub>H<sub>4</sub>CN</sup>), 1.18 / 138.1, 28.6, 23.8 (MeIPr / *o*-Ar, HClPr, MeIPr'), 1.15 / 138.1, 28.6, 23.0 (MeIPr' / *o*-Ar, HClPr, MeIPr).

**<sup>1</sup>H, <sup>13</sup>C-GHSQC** (400 MHz / 100 MHz, C<sub>7</sub>D<sub>8</sub>, 298 K): δ (<sup>1</sup>H) / δ (<sup>13</sup>C) = 7.48 / 118.7 (*m*-C<sub>6</sub>H<sub>4</sub>CN / *m*-C<sub>6</sub>H<sub>4</sub>CN), 7.12 / 123.4 (*m*-Ar / *m*-Ar), 7.09 / 123.8 (*p*-Ar / *p*-Ar), 7.05 / 133.0 (*o*-C<sub>6</sub>H<sub>4</sub>CN / *o*-C<sub>6</sub>H<sub>4</sub>CN), 2.95 / 28.6 (HClPr / HClPr), 1.33 / 18.3 (MeC / MeC), 1.18 / 23.0 (MeIPr / MeIPr), 1.15 / 23.8 (MeIPr' / MeIPr').

**GCOSY** (400 MHz / 400 MHz, C<sub>7</sub>D<sub>8</sub>, 298 K): δ (<sup>1</sup>H) / δ (<sup>1</sup>H) = 7.48 / 7.05 (*m*-C<sub>6</sub>H<sub>4</sub>CN / *o*-C<sub>6</sub>H<sub>4</sub>CN), 2.95 / 1.18 (HClPr / MeIPr), 2.95 / 1.15 (HClPr / MeIPr').

**IR (KBr):** ν/cm<sup>-1</sup> = 3427, 3100, 3076, 2965, 2225 (ν(C≡N), s), 1676, 1586, 1536, 1378, 1338, 1195, 1174, 1105, 1058, 1007, 933, 845, 822, 785, 759, 651, 547.

**Elemental analysis (%):** C<sub>21</sub>H<sub>25</sub>N<sub>3</sub> (M = 319.44 g/mol): calculated C 78.96, H 7.89, N 13.15; found C 79.04, H 7.84, N 13.17.

**MS (ESI, Exact mass):** Calc: 342.195 ; Found: 342.194 [C<sub>21</sub>H<sub>25</sub>N<sub>3</sub> Na<sup>+</sup>]. Calc: 320.213 ; Found: 320.212 [C<sub>21</sub>H<sub>25</sub>N<sub>3</sub> H<sup>+</sup>].

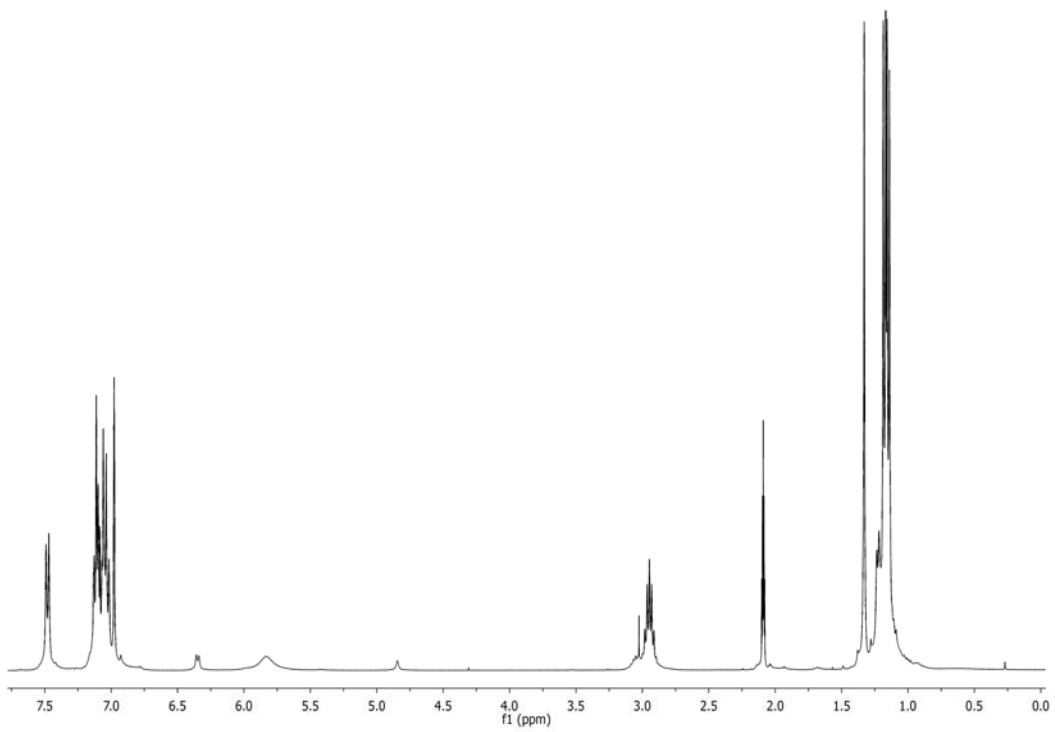

$^1\text{H}$  NMR (400 MHz,  $\text{C}_7\text{D}_8$ , 298 K)

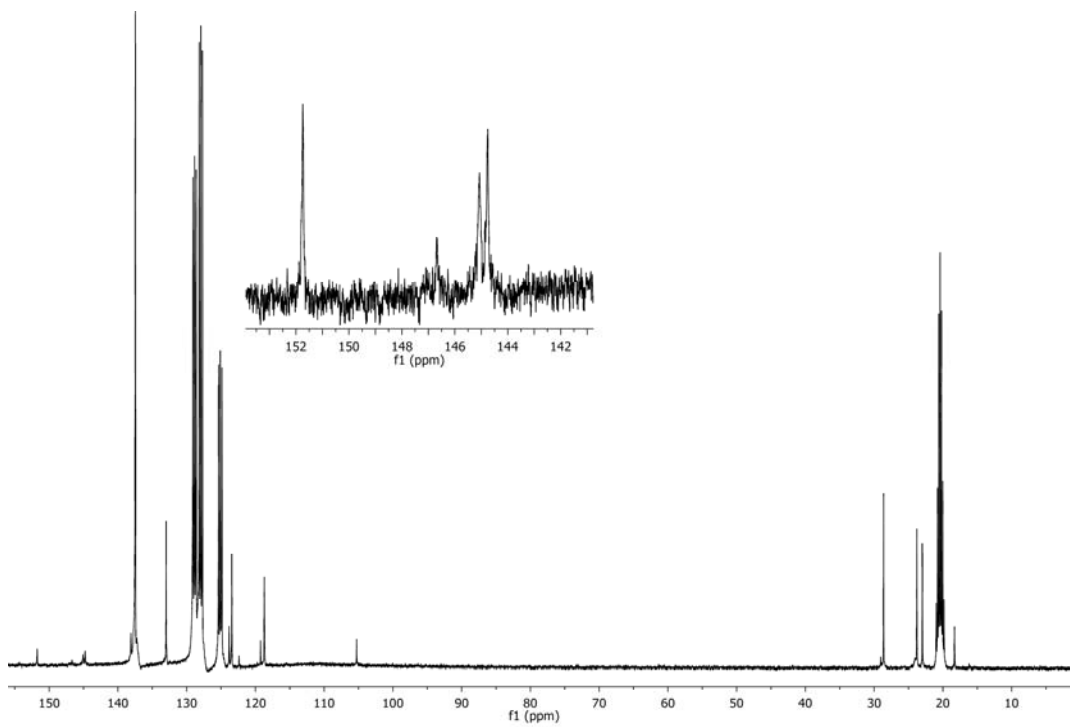

$^{13}\text{C}\{^1\text{H}\}$  NMR (100 MHz,  $\text{C}_7\text{D}_8$ , 298 K)

**[N'-(2,6-diisopropylphenyl)-N-(pentafluorophenyl)acetimidamide]bis(pentafluorophenyl)borate (2a)**

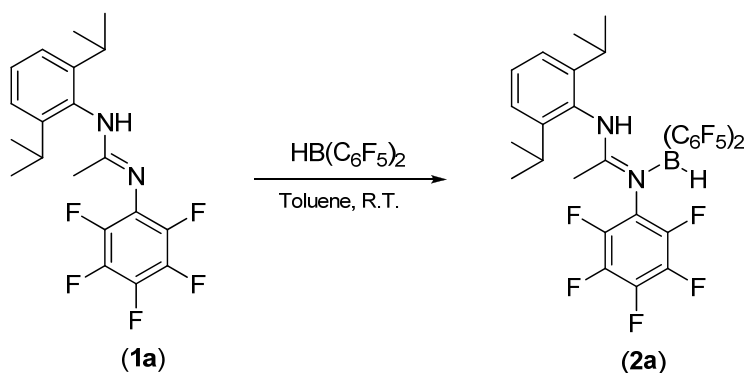

Bis(pentafluorophenyl)borane [HB(C<sub>6</sub>F<sub>5</sub>)<sub>2</sub>] (180 mg, 0.52 mmol) in toluene (10 ml) was added to a solution of **1a** <sup>[2]</sup> (200 mg, 0.52 mmol) in toluene (10 ml). The reaction mixture was stirred for 2 hours at room temperature. Then, the volatiles were removed in vacuum, and the solid washed with pentane. Finally the white solid is recrystallized from cold toluene given **2a** as a white crystalline material in 87% yield (331 mg, 0.45 mmol).

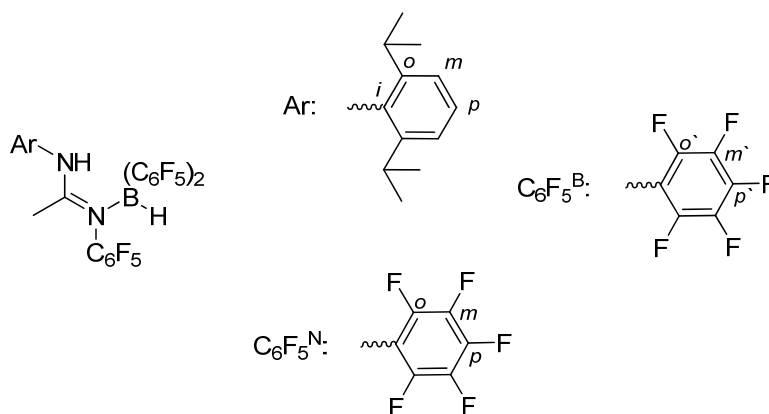

<sup>1</sup>H NMR (600 MHz, C<sub>7</sub>D<sub>8</sub>, 298 K): δ/ppm = 8.33 (s, 1H, NH), 7.05 (m, 1H, *p*-Ar), 6.88 (d, *J* = 6.9 Hz, 2H, *m*-Ar), 4.57 (br, 1H, BH), 2.87 (hept, *J* = 6.9 Hz, 2H, H*Ci*Pr), 1.27 (s, 3H, MeC), 1.06 (d, *J* = 6.9 Hz, 6H, Me*i*Pr), 0.91 (d, *J* = 6.9 Hz, 6H, Me*i*Pr').

<sup>13</sup>C{<sup>1</sup>H} NMR (151 MHz, C<sub>7</sub>D<sub>8</sub>, 298 K): δ/ppm = 169.2 (<sup>Ar-N</sup>C<sup>N-C6F5N</sup>), 146.3 (*o*-Ar), 131.0 (*p*-Ar), 130.6 (*i*-Ar), 124.8 (*m*-Ar), 28.8 (H*Ci*Pr), 23.9 (Me*i*Pr'), 22.6 (Me*i*Pr), 16.8 (MeC).

<sup>1</sup>H, <sup>13</sup>C-GHMBC (600 MHz / 151 MHz, C<sub>7</sub>D<sub>8</sub>, 298 K): δ (<sup>1</sup>H) / δ (<sup>13</sup>C) = 7.05 / 146.3 (*p*-Ar / *o*-Ar), 6.88 / 146.3, 130.6, 28.8 (*m*-Ar / *o*-Ar, *i*-Ar, H*Ci*Pr), 2.87 / 146.3, 130.6, 124.8, 23.9, 22.6 (H*Ci*Pr

/ *o*-Ar, *i*-Ar, *m*-Ar, MeIPr', MeIPr ), 1.27 / 169.2 (MeC /  $^{Ar-N}C^{N-C_6F_5N}$ ), 1.06 / 146.3, 28.8, 23.9 (MeIPr / *o*-Ar, HClPr, MeIPr'), 0.91 / 146.3, 28.8, 22.6 (MeIPr' / *o*-Ar, HClPr, MeIPr).

$^1H$ ,  $^{13}C$ -GHSQC (600 MHz / 151 MHz,  $C_7D_8$ , 298 K):  $\delta (^1H) / \delta (^{13}C) = 7.05 / 131.0$  (*p*-Ar / *p*-Ar), 6.88 / 124.8 (*m*-Ar / *m*-Ar), 2.87 / 28.8 (HClPr / HClPr), 1.27 / 16.8 (MeC / MeC), 1.06 / 22.6 (MeIPr / MeIPr), 0.91 / 23.9 (MeIPr' / MeIPr').

GCOSY (600 MHz / 600 MHz,  $C_7D_8$ , 298 K):  $\delta (^1H) / \delta (^1H) = 7.05 / 6.88$  (*p*-Ar / *m*-Ar), 2.87 / 1.06 (HClPr / MeIPr), 2.87 / 0.91 (HClPr / MeIPr').

$^1H$ {NOE} NMR (600 MHz,  $C_7D_8$ , 298 K):  $\delta (^1H_{irr}) / \delta (^1H_{res}) = 7.05 / 6.88$  (*p*-Ar / *m*-Ar), 6.88 / 7.05, 1.06, 0.91 (*m*-Ar / *p*-Ar, MeIPr, MeIPr'), 2.87 / 1.06, 0.91 (HClPr / MeIPr, MeIPr'), 1.27 / 1.06, 0.91 (MeC / MeIPr, MeIPr'), 1.06 / 6.88, 2.87, 0.91 (MeIPr / *m*-Ar, HClPr, MeIPr'), 0.91 / 6.88, 2.87, 1.06 (MeIPr' / *m*-Ar, HClPr, MeIPr).

1D TOCSY (500 MHz,  $CD_2Cl_2$ , 298 K):  $\delta (^1H_{irr}) / \delta (^1H_{res})$  [ppm] = 7.05 / 6.88 (*p*-Ar / *m*-Ar), 6.88 / 7.05 (*m*-Ar / *p*-Ar), 2.87 / 1.06, 0.91 (HClPr / MeIPr, MeIPr'), 1.06 / 6.88, 2.87, 0.91 (MeIPr / *m*-Ar, HClPr, MeIPr'), 0.91 / 6.88, 2.87, 1.06 (MeIPr' / *m*-Ar, HClPr, MeIPr).

$^{19}F$  NMR (564 MHz,  $C_7D_8$ , 298 K):  $\delta$ /ppm = -132.9 (s, 4F, *o*- $C_6F_5^B$ ), -144.1 (d,  $J = 17.4$ Hz, 2F, *o*- $C_6F_5^N$ ), -153.3 (t,  $J = 21.9$ Hz, 1F, *p*- $C_6F_5^N$ ), -157.4 (t,  $J = 20.3$ Hz, 2F, *p*- $C_6F_5^B$ ), -161.4 (td,  $J = 22.7$ , 6.2 Hz, 2F, *m*- $C_6F_5^N$ ), -163.7 (td,  $J = 23.8$ , 9.5 Hz, 4F, *m*- $C_6F_5^B$ ).

$^{19}F$ ,  $^{19}F$  GCOSY (564 MHz,  $C_7D_8$ , 298 K):  $\delta (^{19}F) / \delta (^{19}F) = -132.9 / -163.7$  (*o*- $C_6F_5^B$  / *m*- $C_6F_5^B$ ), -144.1 / -161.4 (*o*- $C_6F_5^N$  / *m*- $C_6F_5^N$ ), -153.3 / -161.4 (*p*- $C_6F_5^N$  / *m*- $C_6F_5^N$ ), -157.4 / -163.7 (*p*- $C_6F_5^B$  / *m*- $C_6F_5^B$ ).

$^{11}B$ {1H} NMR (192 MHz,  $C_7D_8$ , 298 K):  $\delta$ /ppm = -13.3 ( $\nu_{1/2} \sim 230$  Hz).

IR (KBr):  $\nu/cm^{-1} = 3345, 3071, 2973, 2934, 2876, 2388, 1644, 1606, 1529, 1458, 1389, 1331, 1287, 1109, 1043, 994, 972, 913, 878, 849, 818, 801, 766, 741, 701, 670, 565, 535$ .

Elemental analysis (%)  $C_{32}H_{22}BF_{15}N_2$  (M = 730.32 g/mol): calculated C 52.63, H 3.04, N 3.84; found C 54.30, H 3.27, N 3.80.

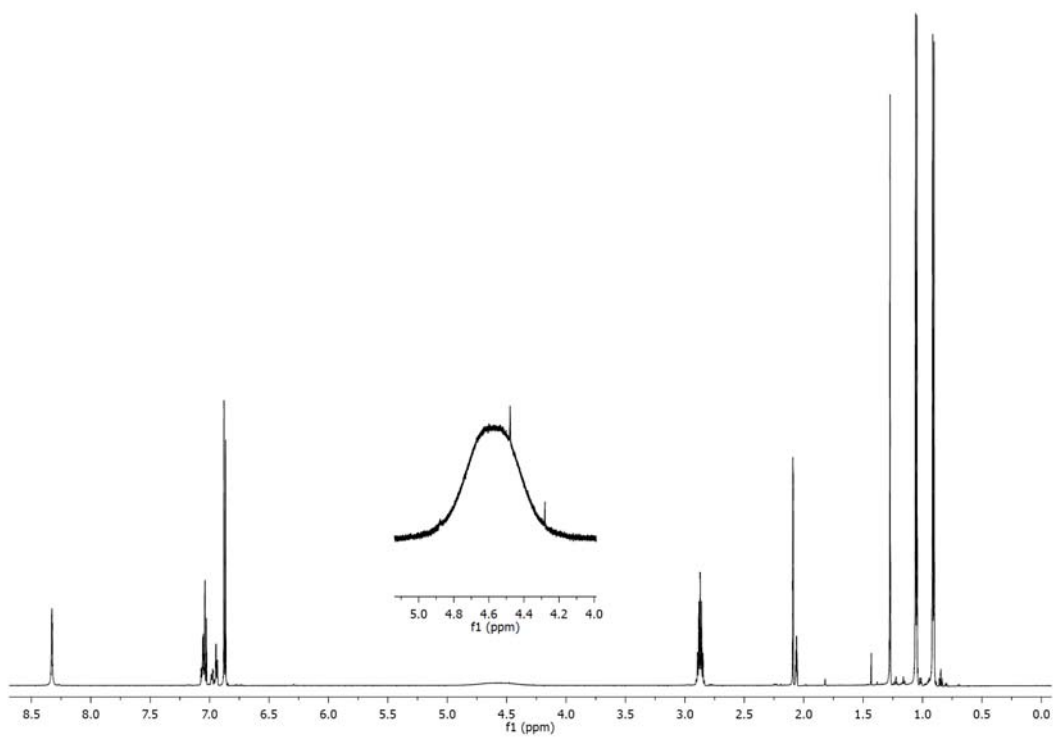

$^1\text{H}$  NMR (600 MHz,  $\text{C}_7\text{D}_8$ , 298 K)

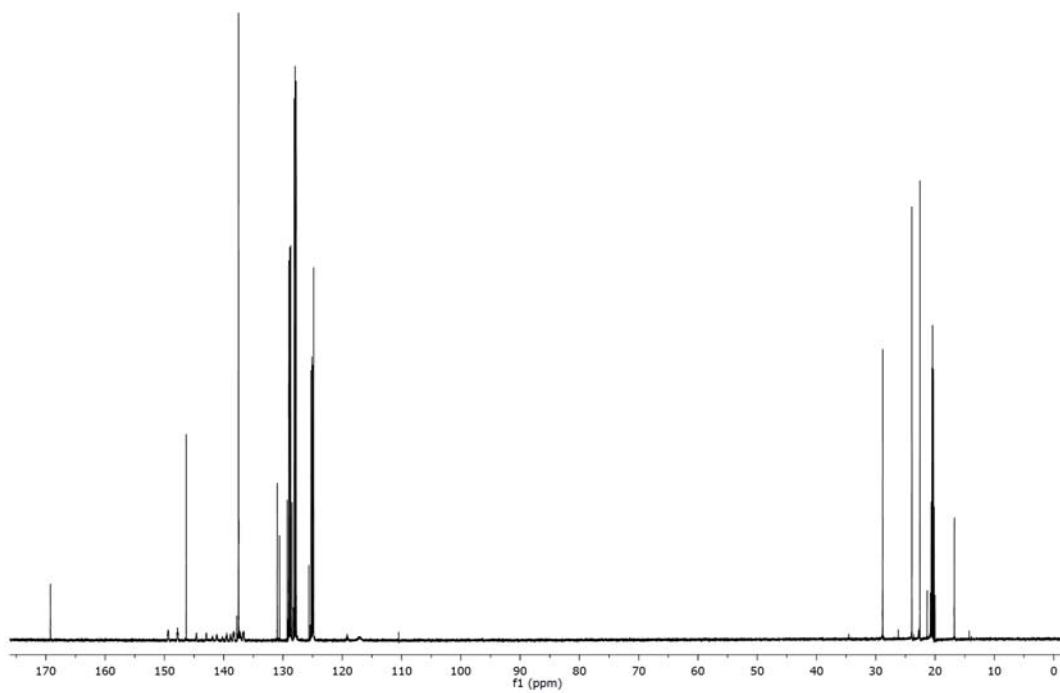

$^{13}\text{C}\{^1\text{H}\}$  NMR (151 MHz,  $\text{C}_7\text{D}_8$ , 298 K)



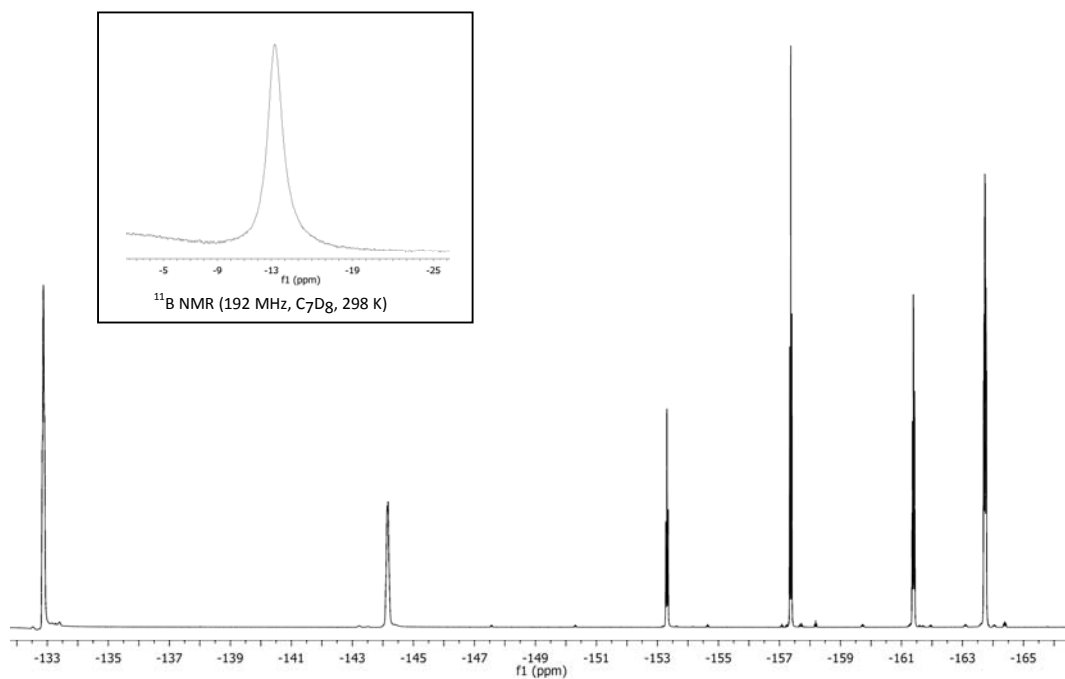

$^{19}\text{F}$  NMR (564 MHz,  $\text{C}_7\text{D}_8$ , 298 K)

X-ray crystal structure analysis of **2a**:

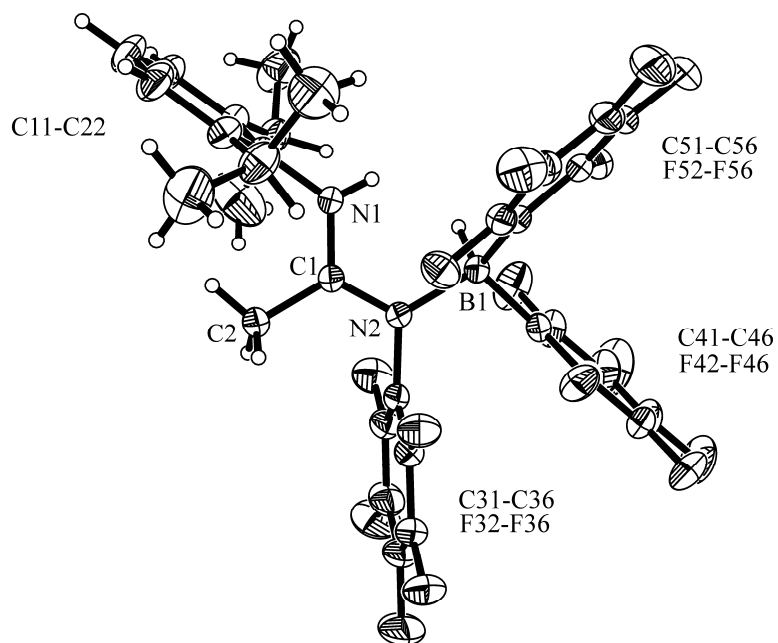

**[N'-(2,6-diisopropylphenyl)-N-(4-cyanophenyl)acetimidamide]bis(pentafluorophenyl)borate (2b)**

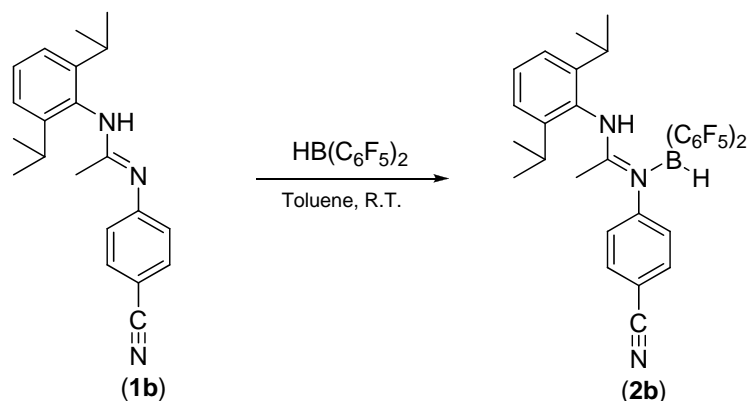

Bis(pentafluorophenyl)borane [HB(C<sub>6</sub>F<sub>5</sub>)<sub>2</sub>] (217 mg, 0.63 mmol) in toluene (10 ml) was added to a solution of **1b** (200 mg, 0.63 mmol) in toluene (10 ml). The reaction mixture was stirred for 2 hours at room temperature. Then, the volatiles were removed in vacuum and the solid washed with pentane. Finally the white solid is recrystallized from cold toluene given **2b** as white crystalline material in 90% yield (375 mg, 0.56 mmol).

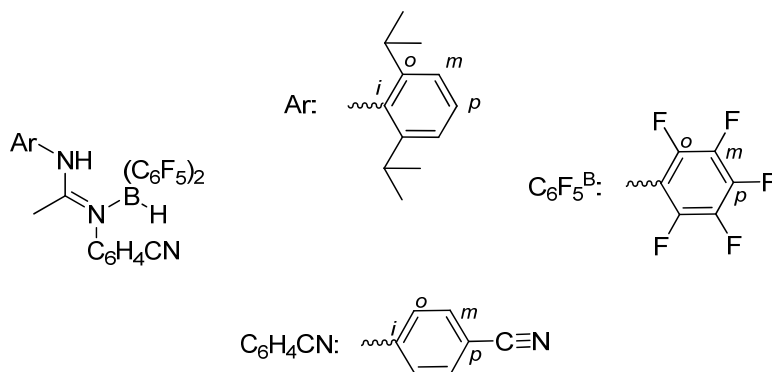

<sup>1</sup>H NMR (600 MHz, C<sub>7</sub>D<sub>8</sub>, 298 K): δ/ppm = 8.03 (s, 1H, NH), 7.06 (t, *J* = 7.7Hz, 1H, *p*-Ar), 6.89 (d, *J* = 7.7Hz, 2H, *m*-Ar), 6.81 (d, *J* = 8.5Hz, 2H, *m*-C<sub>6</sub>H<sub>4</sub>CN), 6.67 (d, *J* = 8.5Hz, 2H, *o*-C<sub>6</sub>H<sub>4</sub>CN), 4.55 (br, 1H, BH), 2.87 (hept, *J* = 6.9Hz, 2H, HClPr), 1.15 (s, 3H, MeC), 1.08 (d, *J* = 6.9 Hz, 6H, MeIPr), 0.94 (d, *J* = 6.9 Hz, 6H, MeIPr').

<sup>13</sup>C{<sup>1</sup>H} NMR (151 MHz, C<sub>7</sub>D<sub>8</sub>, 298 K): δ/ppm = 165.5 (<sup>Ar-N</sup>C<sup>N-C6H4CN</sup>), 147.1 (*i*-C<sub>6</sub>H<sub>4</sub>CN), 146.3 (*o*-Ar), 133.1 (*o*-C<sub>6</sub>H<sub>4</sub>CN), 131.0 (*i*-Ar), 130.6 (*p*-Ar), 127.2 (*m*-C<sub>6</sub>H<sub>4</sub>CN), 124.7 (*m*-Ar), 117.4 (*p*-C<sub>6</sub>H<sub>4</sub>CN), 112.4 (C≡N), 29.1 (HClPr), 23.8 (MeIPr'), 22.5 (MeIPr), 16.9 (MeC).

**<sup>1</sup>H, <sup>13</sup>C-GHMBC** (600 MHz / 151 MHz, C<sub>7</sub>D<sub>8</sub>, 298 K): δ (<sup>1</sup>H) / δ (<sup>13</sup>C) = 7.06 / 146.3 (*p*-Ar / *o*-Ar), 6.89 / 131.0, 29.1 (*m*-Ar / *i*-Ar, HClPr), 6.81 / 133.1, 112.4 (*m*-C<sub>6</sub>H<sub>4</sub>CN / *o*-C<sub>6</sub>H<sub>4</sub>CN, C≡N), 6.67 / 147.1, 127.2, 117.4 (*o*-C<sub>6</sub>H<sub>4</sub>CN / *i*-C<sub>6</sub>H<sub>4</sub>CN, *m*-C<sub>6</sub>H<sub>4</sub>CN, *p*-C<sub>6</sub>H<sub>4</sub>CN), 2.87 / 146.3, 131.0, 124.7, 23.8, 22.5 (HClPr / *o*-Ar, *i*-Ar, *m*-Ar, MeIPr', MeIPr), 1.15 / 165.5 (MeC / <sup>Ar-N</sup>C<sup>N-C<sub>6</sub>H<sub>4</sub>CN</sup>), 1.08 / 146.3, 29.1, 23.8 (MeIPr / *o*-Ar, HClPr, MeIPr'), 0.94 / 146.3, 29.1, 22.5 (MeIPr' / *o*-Ar, HClPr, MeIPr).

**<sup>1</sup>H, <sup>13</sup>C-GHSQC** (600 MHz / 151 MHz, C<sub>7</sub>D<sub>8</sub>, 298 K): δ (<sup>1</sup>H) / δ (<sup>13</sup>C) = 7.06 / 130.6 (*p*-Ar / *p*-Ar), 6.89 / 124.7 (*m*-Ar / *m*-Ar), 6.81 / 127.2 (*m*-C<sub>6</sub>H<sub>4</sub>CN / *m*-C<sub>6</sub>H<sub>4</sub>CN), 6.67 / 133.1 (*o*-C<sub>6</sub>H<sub>4</sub>CN / *o*-C<sub>6</sub>H<sub>4</sub>CN), 2.87 / 29.1 (HClPr / HClPr), 1.15 / 16.9 (MeC / MeC), 1.08 / 22.5 (MeIPr / MeIPr), 0.94 / 23.8 (MeIPr' / MeIPr').

**GCOSY** (600 MHz / 600 MHz, C<sub>7</sub>D<sub>8</sub>, 298 K): δ (<sup>1</sup>H) / δ (<sup>1</sup>H) = 7.06 / 6.89 (*p*-Ar / *m*-Ar), 6.81 / 6.67 (*m*-C<sub>6</sub>H<sub>4</sub>CN / *o*-C<sub>6</sub>H<sub>4</sub>CN), 2.87 / 1.08 (HClPr / MeIPr), 2.87 / 0.94 (HClPr / MeIPr').

**<sup>1</sup>H{NOE} NMR** (600 MHz, C<sub>7</sub>D<sub>8</sub>, 298 K): δ (<sup>1</sup>H<sub>irr</sub>) / δ (<sup>1</sup>H<sub>res</sub>) = 7.06 / 6.89 (*p*-Ar / *m*-Ar), 6.89 / 7.06, 1.08, 0.94 (*m*-Ar / *p*-Ar, MeIPr, MeIPr'), 6.81 / 6.67, 1.15 (*m*-C<sub>6</sub>H<sub>4</sub>CN / *o*-C<sub>6</sub>H<sub>4</sub>CN, MeC), 6.67 / 6.81 (*o*-C<sub>6</sub>H<sub>4</sub>CN / *m*-C<sub>6</sub>H<sub>4</sub>CN), 2.87 / 8.03, 1.15, 1.08, 0.94 (HClPr / NH, MeC, MeIPr, MeIPr'), 1.15 / 6.81, 6.67, 2.87 (MeC / *m*-C<sub>6</sub>H<sub>4</sub>CN, *o*-C<sub>6</sub>H<sub>4</sub>CN, HClPr), 1.08 / 6.89, 2.87, 0.94 (MeIPr / *m*-Ar, HClPr, MeIPr'), 0.94 / 6.89, 2.87, 1.08 (MeIPr' / *m*-Ar, HClPr, MeIPr).

**1D TOCSY** (500 MHz, CD<sub>2</sub>Cl<sub>2</sub>, 298 K): δ (<sup>1</sup>H<sub>irr</sub>) / δ (<sup>1</sup>H<sub>res</sub>) [ppm] = 7.06 / 6.89 (*p*-Ar / *m*-Ar), 6.89 / 7.06 (*m*-Ar / *p*-Ar), 6.81 / 6.67 (*m*-C<sub>6</sub>H<sub>4</sub>CN / *o*-C<sub>6</sub>H<sub>4</sub>CN), 6.67 / 6.81 (*o*-C<sub>6</sub>H<sub>4</sub>CN / *m*-C<sub>6</sub>H<sub>4</sub>CN), 2.87 / 1.08, 0.94 (HClPr / MeIPr, MeIPr'), 1.08 / 6.89, 2.87, 0.94 (MeIPr / *m*-Ar, HClPr, MeIPr'), 0.94 / 6.89, 2.87, 1.08 (MeIPr' / *m*-Ar, HClPr, MeIPr).

**<sup>19</sup>F NMR** (564 MHz, C<sub>7</sub>D<sub>8</sub>, 298 K): δ/ppm = -133.3 (dd, *J* = 23.6, 7.9 Hz, 4F, *o*-C<sub>6</sub>F<sub>5</sub><sup>B</sup>), -157.6 (t, *J* = 20.4 Hz, 2F, *p*-C<sub>6</sub>F<sub>5</sub><sup>B</sup>), -163.7 (td, *J* = 23.9, 9.4 Hz, 4F, *m*-C<sub>6</sub>F<sub>5</sub><sup>B</sup>).

**<sup>19</sup>F, <sup>19</sup>F GCOSY** (564 MHz, C<sub>7</sub>D<sub>8</sub>, 298 K): δ (<sup>19</sup>F) / δ (<sup>19</sup>F) = -133.3 / -163.7 (*o*-C<sub>6</sub>F<sub>5</sub><sup>B</sup> / *m*-C<sub>6</sub>F<sub>5</sub><sup>B</sup>), -157.6 / -163.7 (*p*-C<sub>6</sub>F<sub>5</sub><sup>B</sup> / *m*-C<sub>6</sub>F<sub>5</sub><sup>B</sup>).

**<sup>11</sup>B{<sup>1</sup>H} NMR** (192 MHz, C<sub>7</sub>D<sub>8</sub>, 298 K): δ/ppm = -14.6 (ν<sub>1/2</sub> ~ 210 Hz).

**IR (KBr):** ν/cm<sup>-1</sup> = 3314, 3072, 2969, 2932, 2873, 2366, 2233 (ν(C≡N), s), 1645, 1616, 1598, 1516, 1459, 1379, 1243, 1180, 1107, 921, 868, 845, 804, 762, 699, 669, 577, 547.

**Elemental analysis (%)**  $C_{33}H_{26}BF_{10}N_3$  ( $M = 665.37$  g/mol): calculated C 59.57, H 3.94, N 6.32;  
found C 60.50, H 4.12, N 6.29.

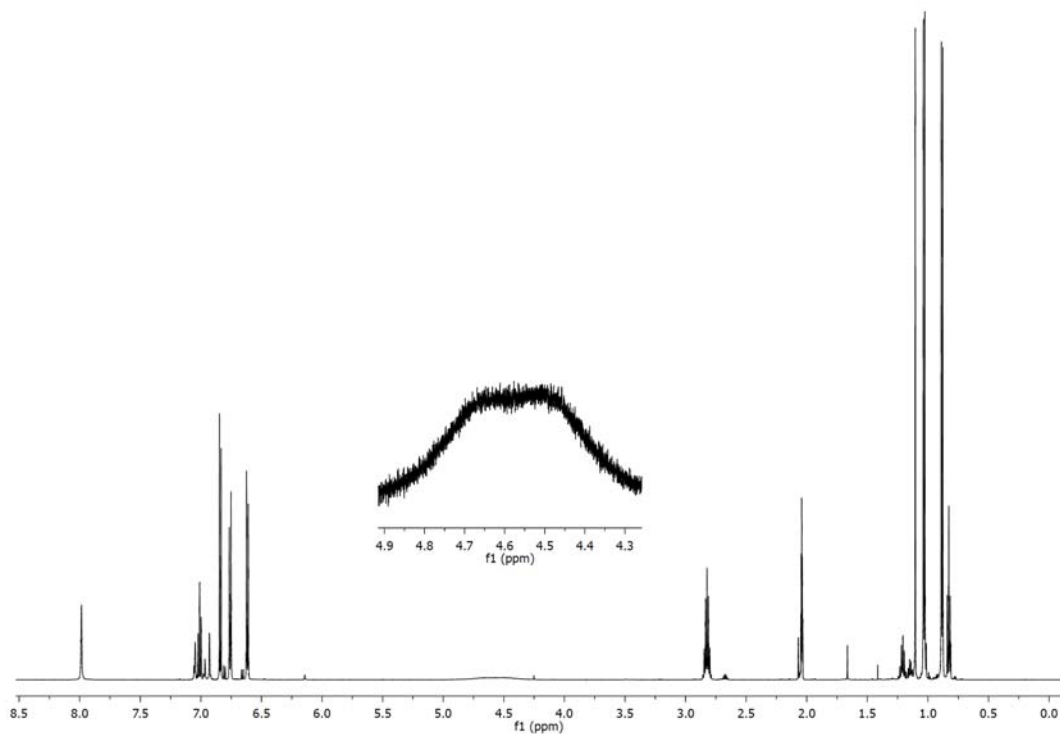

$^1H$  NMR (600 MHz,  $C_7D_8$ , 298 K)

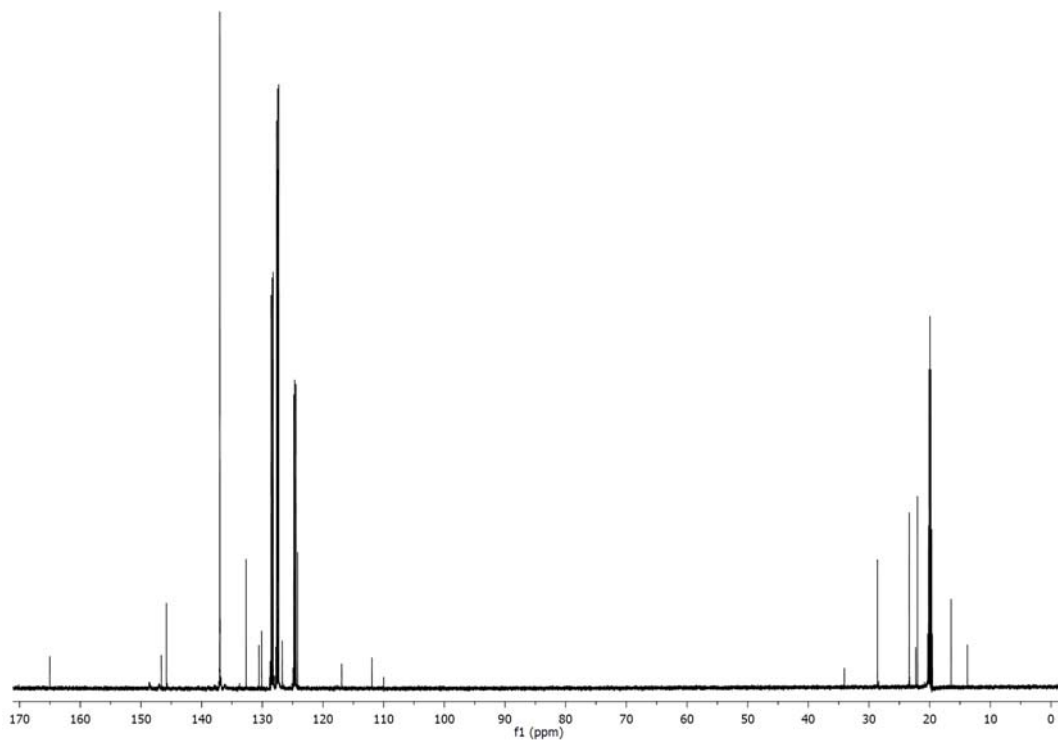

$^{13}\text{C}\{^1\text{H}\}$  NMR (151 MHz,  $\text{C}_7\text{D}_8$ , 298 K)

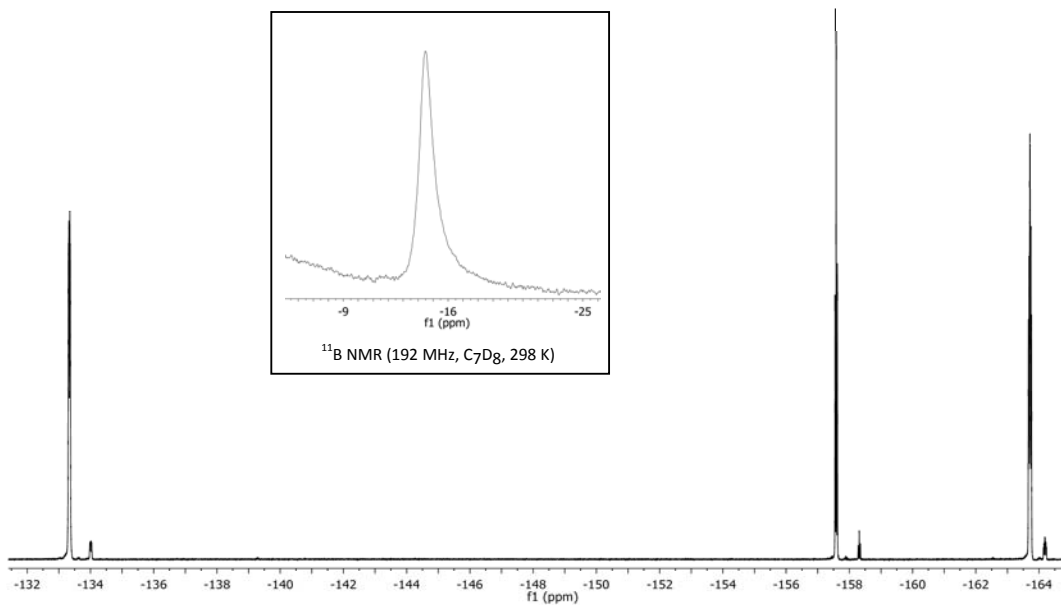

$^{19}\text{F}$  NMR (564 MHz,  $\text{C}_7\text{D}_8$ , 298 K)

X-ray crystal structure analysis of **2b**:

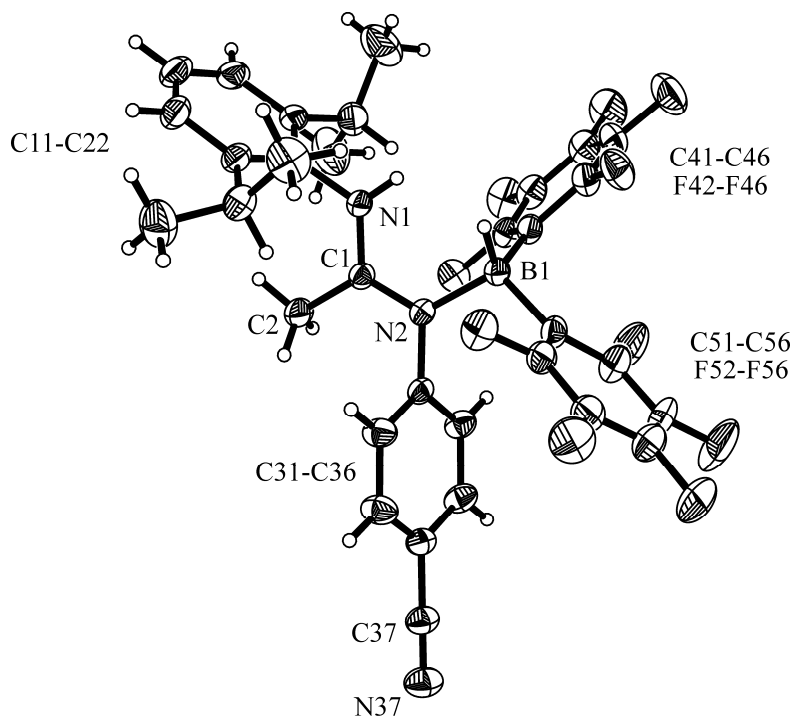

**[N'-(2,6-diisopropylphenyl)-N-(pentafluorophenyl)acetimidamide]bis(pentafluorophenyl)dehydroborane (3a)**

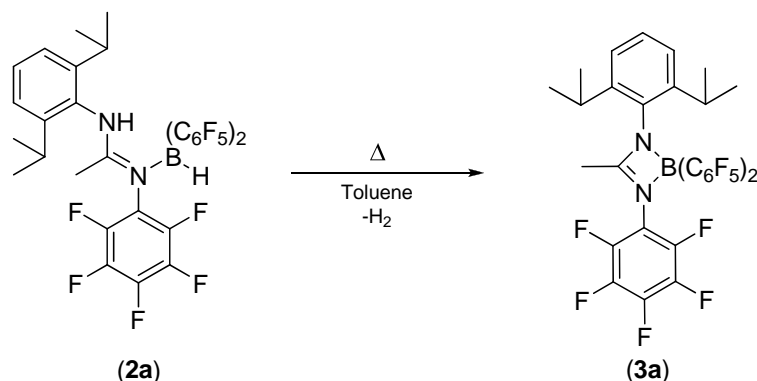

A solution of **2a** (200 mg; 0.27mmol) in toluene (20 ml) was heated to 100°C for 4 hours. Then, the volatiles were removed in vacuum, and the solid washed with pentane. Finally the white solid is recrystallized from cold toluene given **3a** as a white crystalline material in 95% yield (189 mg; 0.26 mmol).

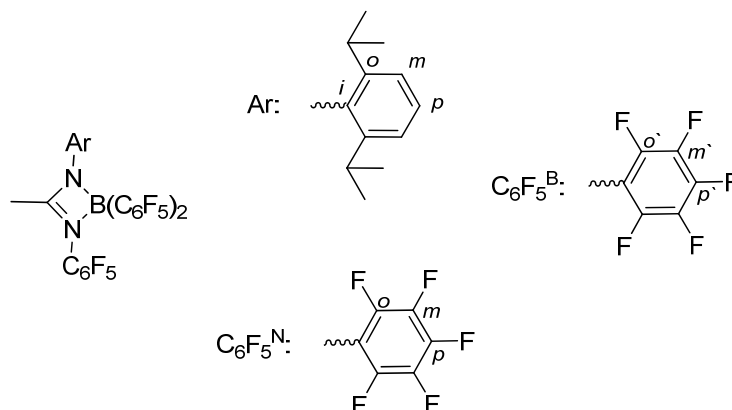

**<sup>1</sup>H NMR** (600 MHz, C<sub>7</sub>D<sub>8</sub>, 298 K):  $\delta$ /ppm = 7.02 (m, 1H, *p*-Ar), 6.89 (d,  $J$  = 6.9Hz, 2H, *m*-Ar), 2.69 (hept,  $J$  = 6.9Hz, 2H, H*Ci*Pr), 1.47 (s, 3H, MeC), 1.00 (d,  $J$  = 6.9 Hz, 6H, Me*i*Pr), 0.72 (d,  $J$  = 6.9 Hz, 6H, Me*i*Pr').

**<sup>13</sup>C{<sup>1</sup>H} NMR** (151 MHz, C<sub>7</sub>D<sub>8</sub>, 298 K):  $\delta$ /ppm = 177.3 (<sup>Ar-N</sup>C<sup>N-C6F5N</sup>), 146.1 (*o*-Ar), 133.4 (*i*-Ar), 129.1 (*p*-Ar), 124.7 (*m*-Ar), 28.9 (H*Ci*Pr), 24.5 (Me*i*Pr), 23.6 (Me*i*Pr'), 13.9 (MeC).

**<sup>1</sup>H, <sup>13</sup>C-GHMBC** (600 MHz / 151 MHz, C<sub>7</sub>D<sub>8</sub>, 298 K):  $\delta$  (<sup>1</sup>H) /  $\delta$  (<sup>13</sup>C) = 7.02 / 146.1, 124.7 (*p*-Ar / *o*-Ar, *m*-Ar), 6.89 / 146.1, 133.4, 129.1, 28.9 (*m*-Ar / *o*-Ar, *i*-Ar, *p*-Ar, H*Ci*Pr), 2.69 / 146.1, 133.4, 124.7, 24.5, 23.6 (H*Ci*Pr / *o*-Ar, *i*-Ar, *m*-Ar, Me*i*Pr', Me*i*Pr), 1.47 / 177.3 (MeC / <sup>Ar-N</sup>C<sup>N-C6F5N</sup>), 1.00

/ 146.1, 28.9, 23.6 (MeiPr / *o*-Ar, HClPr, MeiPr'), 0.72 / 146.1, 28.9, 24.5 (MeiPr' / *o*-Ar, HClPr, MeiPr).

**<sup>1</sup>H, <sup>13</sup>C-GHSQC** (600 MHz / 151 MHz, C<sub>7</sub>D<sub>8</sub>, 298 K): δ (<sup>1</sup>H) / δ (<sup>13</sup>C) = 7.02 / 129.1 (*p*-Ar / *p*-Ar), 6.89 / 124.7 (*m*-Ar / *m*-Ar), 2.69 / 28.9 (HClPr / HClPr), 1.47 / 13.9 (MeC / MeC), 1.00 / 24.5 (MeiPr / MeiPr), 0.72 / 23.6 (MeiPr' / MeiPr').

**GCOSY** (600 MHz / 600 MHz, C<sub>7</sub>D<sub>8</sub>, 298 K): δ (<sup>1</sup>H) / δ (<sup>1</sup>H) = 7.02 / 6.89 (*p*-Ar / *m*-Ar), 2.69 / 1.00 (HClPr / MeiPr), 2.69 / 0.72 (HClPr / MeiPr').

**<sup>1</sup>H{NOE} NMR** (600 MHz, C<sub>7</sub>D<sub>8</sub>, 298 K): δ (<sup>1</sup>H<sub>irr</sub>) / δ (<sup>1</sup>H<sub>res</sub>) = 7.02 / 6.89 (*p*-Ar / *m*-Ar), 6.89 / 7.02, 1.00, 0.72 (*m*-Ar / *p*-Ar, MeiPr, MeiPr'), 2.69 / 1.47, 1.00, 0.72 (HClPr / MeC, MeiPr, MeiPr'), 1.47 / 2.69, 1.00 (MeC / HClPr, MeiPr), 1.00 / 6.89, 2.69, 1.47, 0.72 (MeiPr / *m*-Ar, HClPr, MeC, MeiPr'), 0.72 / 6.89, 2.69, 1.00 (MeiPr' / *m*-Ar, HClPr, MeiPr).

**1D TOCSY** (500 MHz, CD<sub>2</sub>Cl<sub>2</sub>, 298 K): δ (<sup>1</sup>H<sub>irr</sub>) / δ (<sup>1</sup>H<sub>res</sub>) [ppm] = 7.02 / 6.89 (*p*-Ar / *m*-Ar), 6.89 / 7.02, 1.00, 0.72 (*m*-Ar / *p*-Ar, MeiPr, MeiPr'), 2.69 / 1.00, 0.72 (HClPr / MeiPr, MeiPr'), 1.00 / 6.89, 2.69, 0.72 (MeiPr / *m*-Ar, HClPr, MeiPr'), 0.72 / 6.89, 2.69, 1.00 (MeiPr' / *m*-Ar, HClPr, MeiPr).

**<sup>19</sup>F NMR** (564 MHz, C<sub>7</sub>D<sub>8</sub>, 298 K): δ/ppm = -132.8 (d, *J* = 18.7 Hz, 4F, *o*-C<sub>6</sub>F<sub>5</sub><sup>B</sup>), -147.6 (d, *J* = 21.0 Hz, 2F, *o*-C<sub>6</sub>F<sub>5</sub><sup>N</sup>), -154.5 (t, *J* = 20.5 Hz, 2F, *p*-C<sub>6</sub>F<sub>5</sub><sup>B</sup>), -157.2 (t, *J* = 22.1 Hz, 1F, *p*-C<sub>6</sub>F<sub>5</sub><sup>N</sup>), -161.9 (td, *J* = 22.7, 5.0 Hz, 2F, *m*-C<sub>6</sub>F<sub>5</sub><sup>N</sup>), -163.0 (td, *J* = 24.0, 8.9 Hz, 4F, *m*-C<sub>6</sub>F<sub>5</sub><sup>B</sup>).

**<sup>19</sup>F, <sup>19</sup>F GCOSY** (564 MHz, C<sub>7</sub>D<sub>8</sub>, 298 K): δ (<sup>19</sup>F) / δ (<sup>19</sup>F) = -132.8 / -163.0 (*o*-C<sub>6</sub>F<sub>5</sub><sup>B</sup> / *m*-C<sub>6</sub>F<sub>5</sub><sup>B</sup>), -147.6 / -161.9 (*o*-C<sub>6</sub>F<sub>5</sub><sup>N</sup> / *m*-C<sub>6</sub>F<sub>5</sub><sup>N</sup>), -154.5 / -163.0 (*p*-C<sub>6</sub>F<sub>5</sub><sup>B</sup> / *m*-C<sub>6</sub>F<sub>5</sub><sup>B</sup>), -157.2 / -161.9 (*p*-C<sub>6</sub>F<sub>5</sub><sup>N</sup> / *m*-C<sub>6</sub>F<sub>5</sub><sup>N</sup>).

**<sup>11</sup>B{<sup>1</sup>H} NMR** (192 MHz, C<sub>7</sub>D<sub>8</sub>, 298 K): δ/ppm = 7.52 (ν<sub>1/2</sub> ~ 210 Hz).

**IR (KBr):** ν/cm<sup>-1</sup> = 2970, 2932, 2870, 1658, 1522, 1381, 1330, 1283, 1226, 1157, 1105, 1043, 972, 894, 804, 764, 701, 627, 592, 573, 534.

**Elemental analysis (%)** C<sub>32</sub>H<sub>20</sub>BF<sub>15</sub> N<sub>2</sub> (M = 730.32 g/mol): calculated C 52.77, H 2.77, N 3.85; found C 51.14, H 2.47, N 4.32.



**MS (ESI, Exact mass):** Calc: 727.1 ; Found: 727.1 [ $C_{32}H_{19}BF_{15}N_2^+$ ]. Calc: 709.145 ; Found: 709.149 [ $C_{32}H_{20}BF_{14}N_2^+$ ].

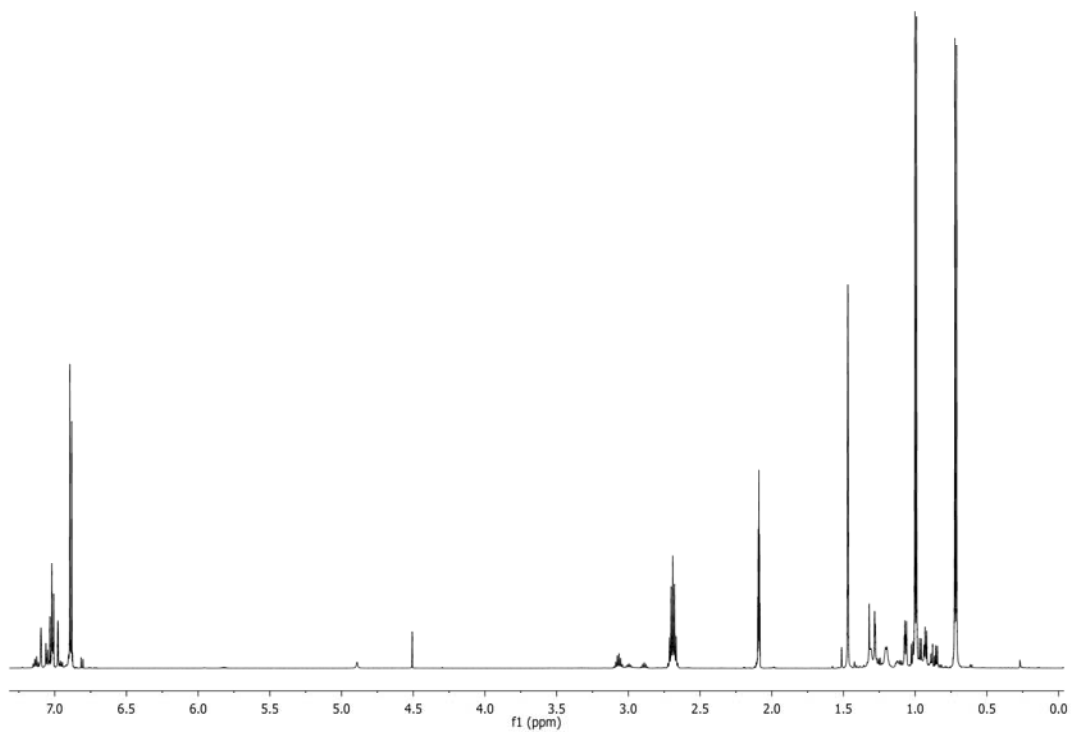

$^1H$  NMR (600 MHz,  $C_7D_8$ , 298 K)

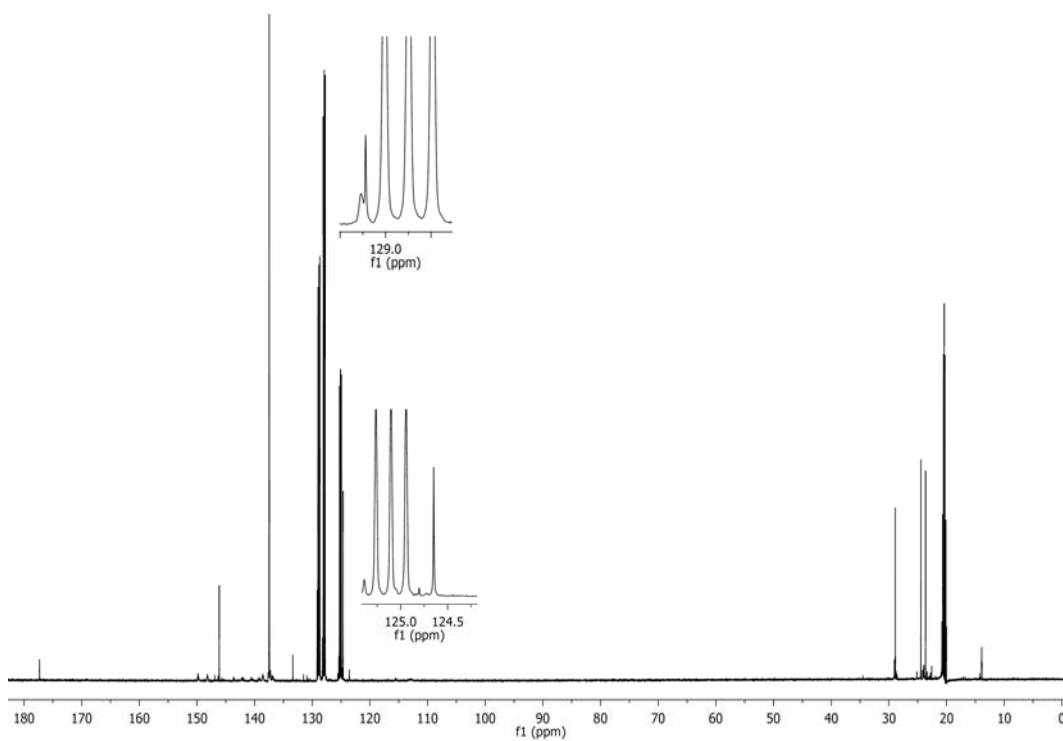

$^{13}\text{C}\{^1\text{H}\}$  NMR (151 MHz,  $\text{C}_7\text{D}_8$ , 298 K)

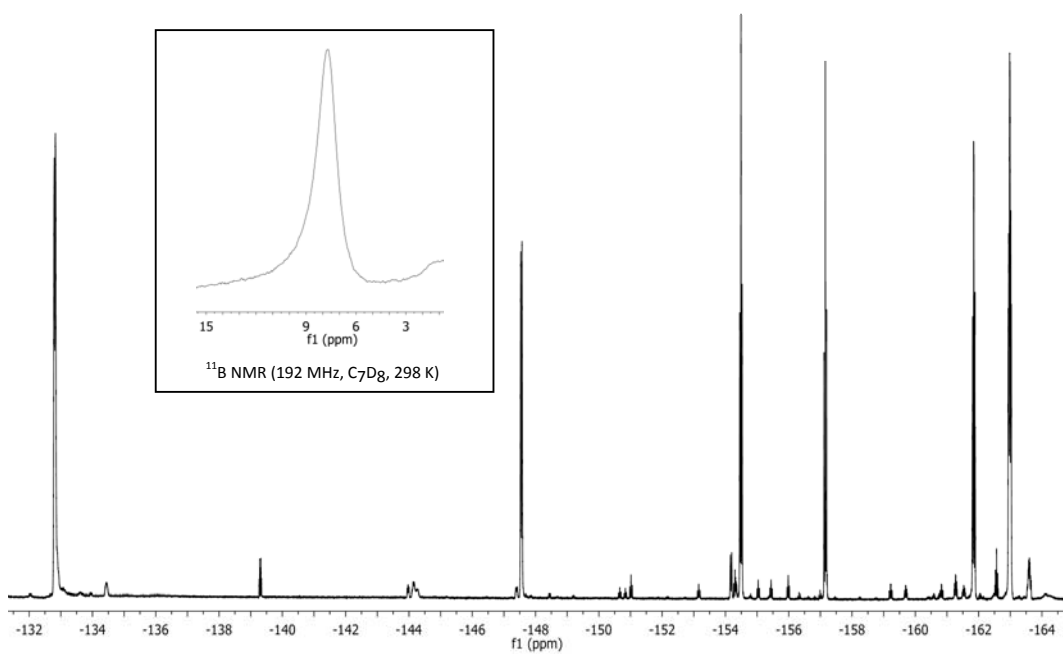

$^{19}\text{F}$  NMR (564 MHz,  $\text{C}_7\text{D}_8$ , 298 K)

X-ray crystal structure analysis of **3a**:

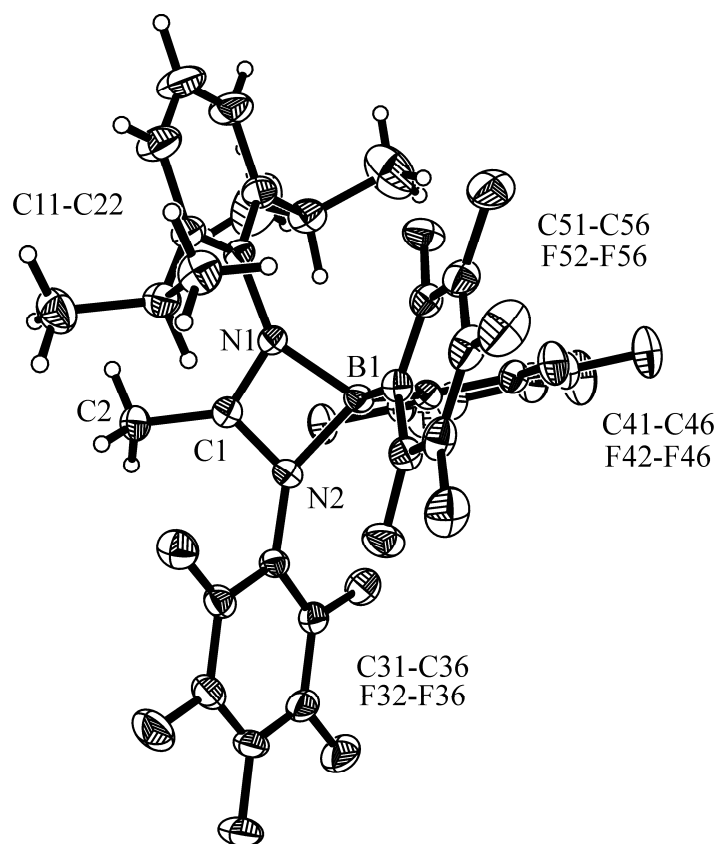

**[N'-(2,6-diisopropylphenyl)-N-(4-cyano(tris(pentafluorophenyl)borane)phenyl)acetimidamide]bis(pentafluoro phenyl)borate (4)**

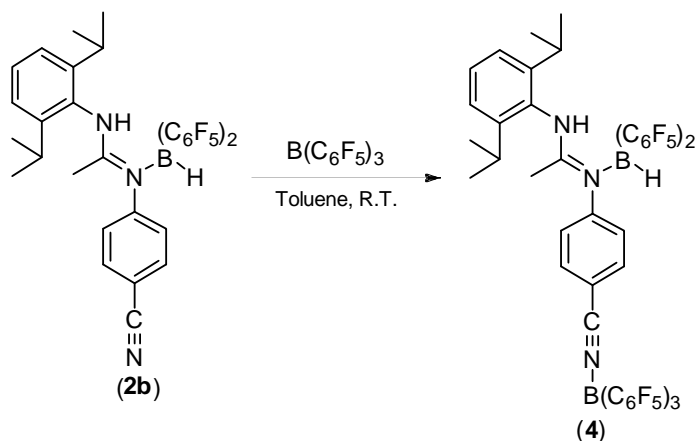

To a stirred solution of **2b** (5.0 mg, 0.009 mmol) in toluene- $d_8$  (0.6 ml) was added  $\text{B(C}_6\text{F}_5)_3$  (4.7 mg, 0.08 mmol). After 15 min the solution was subjected to NMR spectroscopy showing virtually quantitative spectroscopic yield of **4** based on the  $^{19}\text{F}$  NMR spectrum. The volatiles were removed in vacuo and the residue was recrystallized from toluene to afford compound **4** as a colourless solid (7.4 mg, 83.6 %).

$^1\text{H NMR}$  (400 MHz,  $\text{C}_7\text{D}_8$ , 295 K):  $\delta/\text{ppm}$  = 8.17 (s, 1H, NH), 6.96 – 6.86 (m, 8H, Ar), 4.60 (br, 1H, BH), 2.86 (m, 2H, HC(iPr)), 1.18 (d,  $J$  = 10.2 Hz, 12H, Me(iPr)), 0.95 (d,  $J$  = 10.7 Hz, 6H, Me(iPr')).

$^{13}\text{C}\{^1\text{H}\}$  NMR (125 MHz,  $\text{C}_7\text{D}_8$ , 298 K):  $\delta/\text{ppm}$  = 165.5 ( $^{\text{Ar-N}}\text{C}^{\text{N-C}_6\text{F}_5\text{N}}$ ), 146.0 (*o*-Ar), 134.8 (*i*-Ar), 130.6 (*p*-Ar), 124.7 (*m*-Ar), 29.2 (HCiPr), 23.8 (MeiPr), 22.5 (MeiPr'), 17.0 (MeC).

$^{19}\text{F NMR}$  (282 MHz,  $\text{C}_7\text{D}_8$ , 295 K):  $\delta/\text{ppm}$  = -134.77 (dd,  $J$  = 14.9, 9.0 Hz, 4F, *o*- $\text{C}_6\text{F}_5^{\text{B}}$ ,  $-\text{B(C}_6\text{F}_5)_2$ ), -136.07 (m, 6F, *o*- $\text{C}_6\text{F}_5^{\text{B}}$ ,  $\text{B(C}_6\text{F}_5)_3$ ), -156.37 (t,  $J$  = 20.6, 2F, *p*- $\text{C}_6\text{F}_5^{\text{B}}$ ,  $-\text{B(C}_6\text{F}_5)_2$ ), -157.70 (t,  $J$  = 19.7 Hz, 3F, *p*- $\text{C}_6\text{F}_5^{\text{B}}$ ,  $\text{B(C}_6\text{F}_5)_3$ ), -164.08 - -164.47 (m, 10F, *m*- $\text{C}_6\text{F}_5^{\text{B}}$ ,  $-\text{B(C}_6\text{F}_5)_2$ ,  $\text{B(C}_6\text{F}_5)_3$ ).

$^{11}\text{B}\{^1\text{H}\}$  NMR (128 MHz,  $\text{C}_7\text{D}_8$ , 295 K):  $\delta/\text{ppm}$  = -14.09 ( $\nu_{1/2} \sim 256$  Hz).

**Elemental analysis (%)**  $\text{C}_{51}\text{H}_{26}\text{B}_2\text{F}_{25}\text{N}_3$  (M = 1177.35 g/mol): calculated C 52.03, H 2.23, N 3.57; found C 52.34, H 2.40, N 3.50.

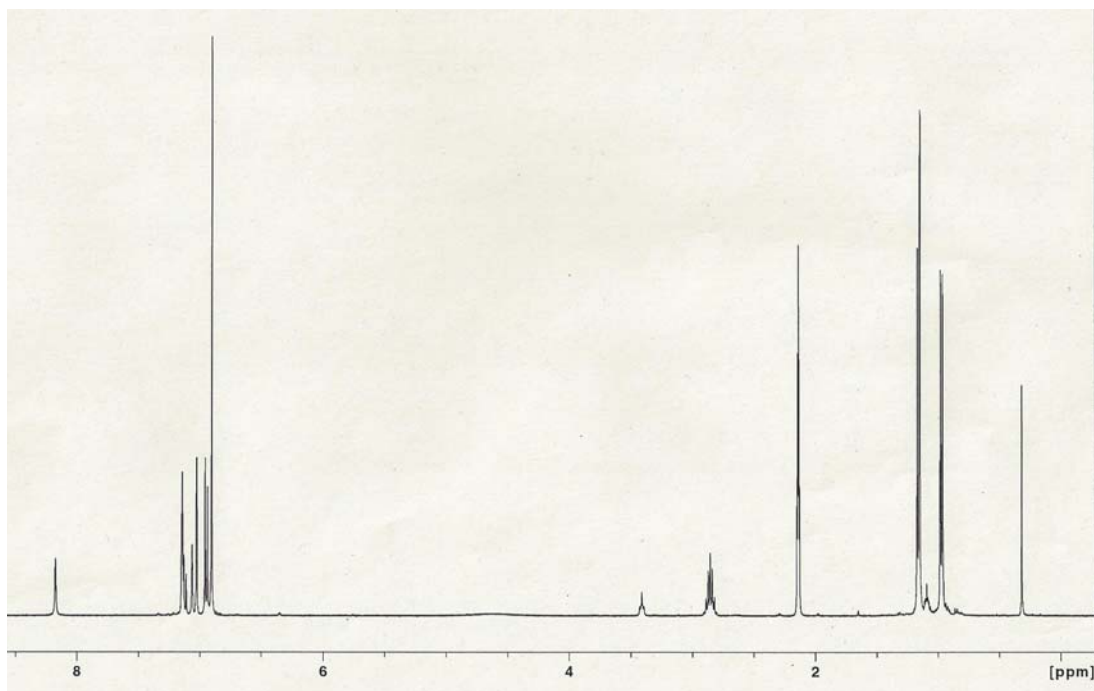

$^1\text{H}$  NMR (400 MHz,  $\text{C}_7\text{D}_8$ , 295 K)

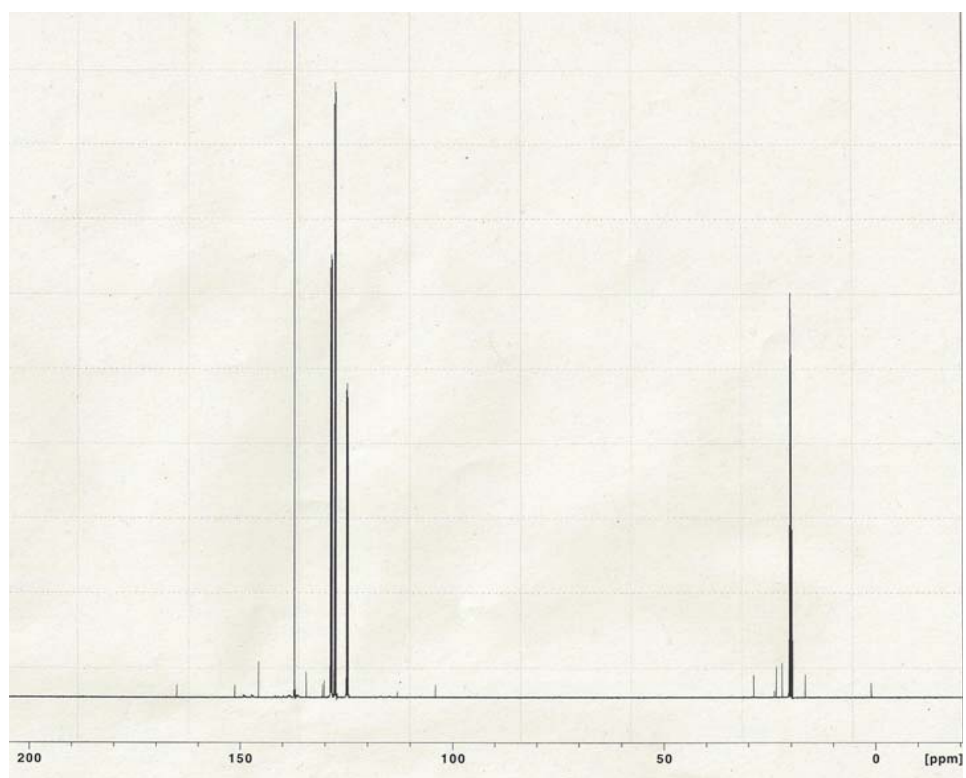

$^{13}\text{C}\{^1\text{H}\}$  NMR (125 MHz,  $\text{C}_7\text{D}_8$ , 310 K)

**[N'-(2,6-diisopropylphenyl)-N-(4-cyano(tris(pentafluorophenyl)borane)phenyl)acetimidamide]bis(pentafluorophenyl)dehydroborane (5)**

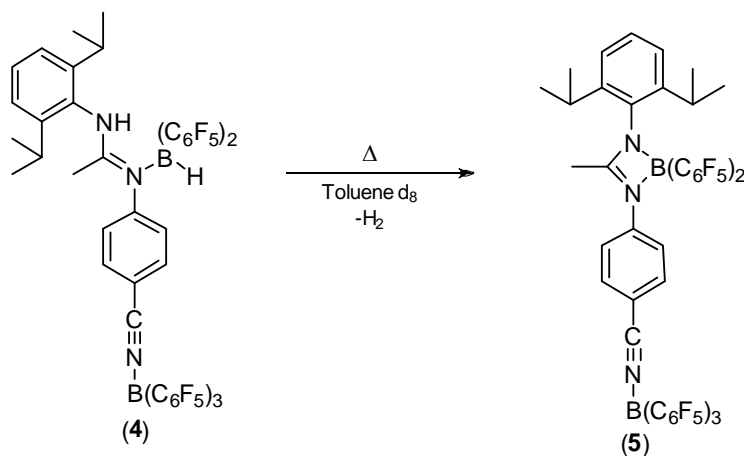

To a solution of **2b** (5.0 mg, 0.008 mmol) in toluene- $d_8$  (0.6 ml) was added  $B(C_6F_5)_3$  (4.7 mg, 0.009 mmol) and the mixture was heated to 120 °C for 22 h. The resulting mixture was subjected to  $^1H$ ,  $^{19}F$ ,  $^{13}C$  and  $^{11}B$  NMR spectroscopy.

$^1H$  NMR (400 MHz,  $C_7D_8$ , 295 K):  $\delta$ /ppm = 7.18 – 6.90 (m, 8H, Ar), 2.54 (m, 2H, HC(iPr)), 0.99 (d,  $J$  = 6.8 Hz, 6H, Me(iPr)), 0.63 (d,  $J$  = 4.4 Hz, 6H, Me(iPr')).

$^{13}C\{^1H\}$  NMR (125 MHz,  $C_7D_8$ , 310 K):  $\delta$ /ppm = 174.7 ( $^{Ar-N}C^{N-C_6F_5N}$ ), 145.5 (*o*-Ar), 135.2 (*i*-Ar), 129.7 (*p*-Ar), 124.0 (*m*-Ar), 29.3 (HCiPr), 24.6 (Me(iPr)), 23.3 (Me(iPr')), 16.5 (MeC).

$^{19}F$  NMR (282 MHz,  $C_7D_8$ , 295 K):  $\delta$ /ppm = -134.55 (m, 4F, *o*- $C_6F_5^B$ ,  $-B(C_6F_5)_2$ ), -135.86 (m, 6F, *o*- $C_6F_5^B$ ,  $B(C_6F_5)_3$ ), -154.12 (t,  $J$  = 20.6 Hz, 2F, *p*- $C_6F_5^B$ ,  $-B(C_6F_5)_2$ ), -156.73 (t,  $J$  = 19.7 Hz, 3F, *p*- $C_6F_5^B$ ,  $B(C_6F_5)_3$ ), -163.14 (m, 4F, *m*- $C_6F_5^B$ ,  $-B(C_6F_5)_2$ ), -164.27 (m, 6F, *m*- $C_6F_5^B$ ,  $B(C_6F_5)_3$ ).

$^{11}B\{^1H\}$  NMR (128 MHz,  $C_7D_8$ , 295 K):  $\delta$ /ppm = -5.64 ( $\nu_{1/2} \sim 128$  Hz,  $-B(C_6F_5)_2$ ), -0.88 ( $\nu_{1/2} \sim 128$  Hz,  $B(C_6F_5)_3$ ).

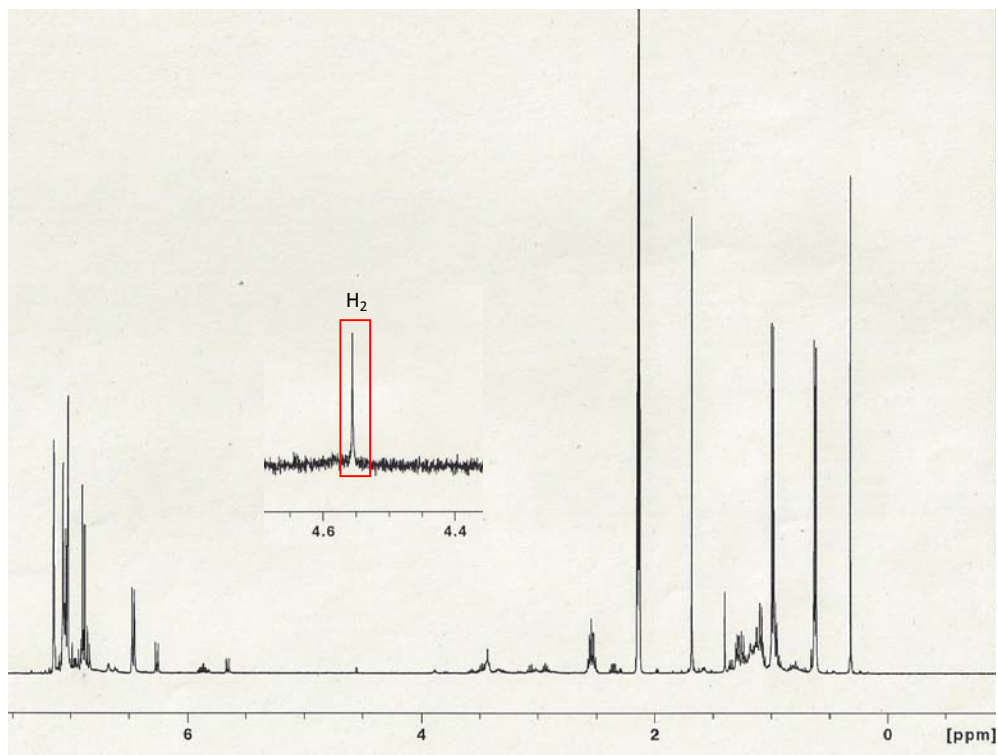

$^1\text{H}$  NMR (400 MHz,  $\text{C}_7\text{D}_8$ , 295 K)

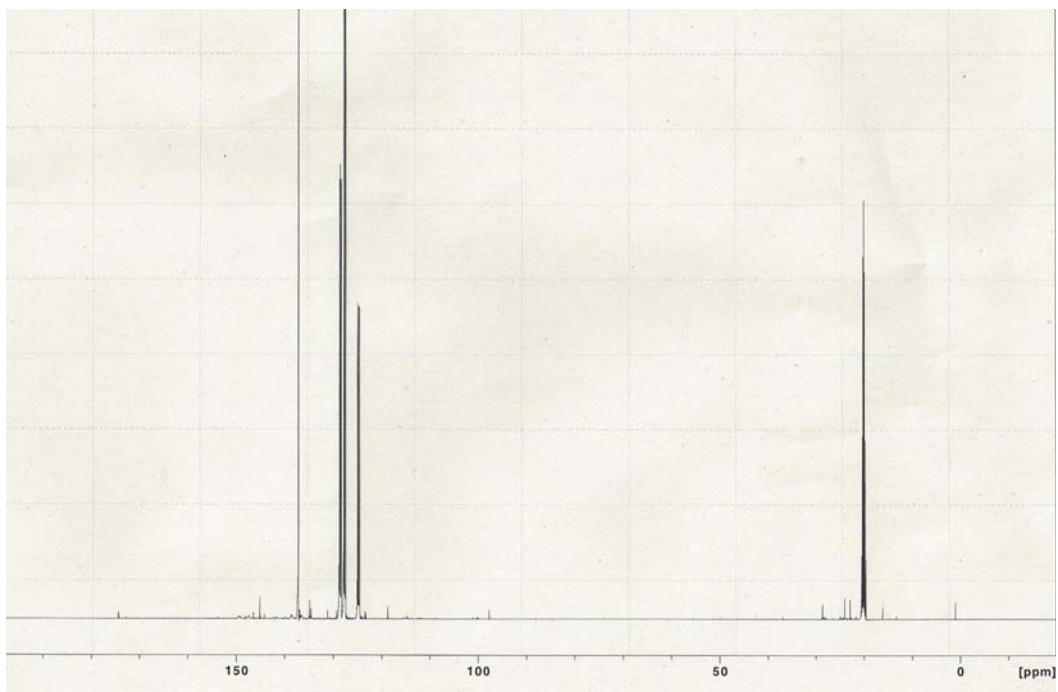

$^{13}\text{C}\{^1\text{H}\}$  NMR (125 MHz,  $\text{C}_7\text{D}_8$ , 310 K)

**[N'-(2,6-diisopropylphenyl)-N-(pentafluorophenyl)acetimidamide](CO)bis(pentafluorophenyl)dehydroborane (6a)**

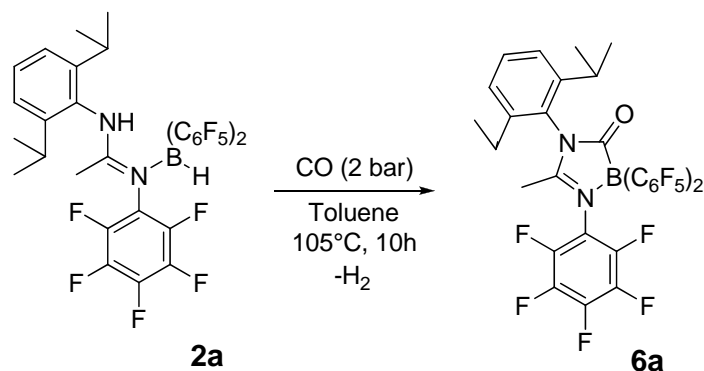

A solution of **2a** (100 mg; 0.14mmol) in toluene (10 ml) was pressurized with 2 bar of CO and heated to 105°C for 10 hours. Then, the volatiles were removed in vacuum. Finally the white solid is recrystallized from cold toluene / pentane, given **6a** as a white crystalline material in 95% yield (98 mg; 0.13 mmol).

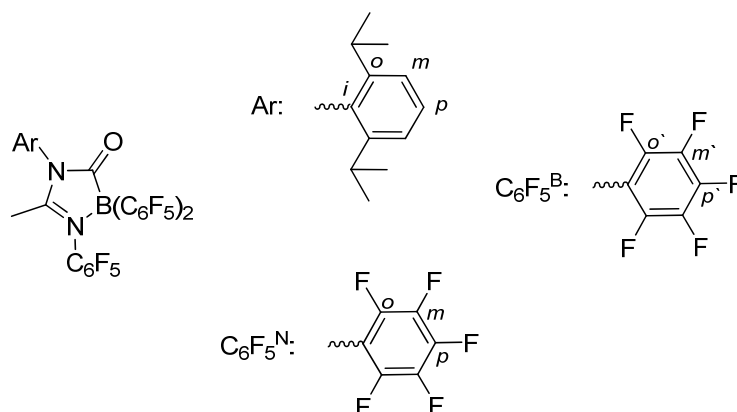

<sup>1</sup>H NMR (600 MHz, C<sub>7</sub>D<sub>8</sub>, 298 K): δ/ppm = 7.16 (t, *J* = 7.8 Hz, 1H, *p*-Ar), 7.00 (d, *J* = 7.8Hz, 2H, *m*-Ar), 2.80 (hept, *J* = 6.8Hz, 2H, H*Ci*Pr), 1.53 (s, 3H, MeC), 1.11 (d, *J* = 6.9 Hz, 6H, Me*i*Pr), 1.07 (d, *J* = 6.8 Hz, 6H, Me*i*Pr').

<sup>13</sup>C{<sup>1</sup>H} NMR (151 MHz, C<sub>7</sub>D<sub>8</sub>, 298 K): δ/ppm = 193 (br., C=O), 176.5 (<sup>Ar-N</sup>C<sup>N-C6F5N</sup>), 147.1 (*o*-Ar), 131.5 (*p*-Ar), 127.6 (*i*-Ar), 125.0 (*m*-Ar), 28.9 (H*Ci*Pr), 24.6 (Me*i*Pr'), 23.4 (Me*i*Pr), 15.7 (MeC).

<sup>1</sup>H, <sup>13</sup>C-GHMBC (600 MHz / 151 MHz, C<sub>7</sub>D<sub>8</sub>, 298 K): δ (<sup>1</sup>H) / δ (<sup>13</sup>C) = 7.16 / 147.1, 125.0 (*p*-Ar / *o*-Ar, *m*-Ar), 7.00 / 127.6, 28.9 (*m*-Ar / *i*-Ar, H*Ci*Pr), 2.80 / 147.1, 127.6, 125.0, 24.6, 23.4 (H*Ci*Pr)



/ *o*-Ar, *i*-Ar, *m*-Ar, MeIPr', MeIPr ), 1.53 / 176.5 (MeC / <sup>Ar-N</sup>C<sup>N-C6F5N</sup>), 1.11 / 147.1, 28.9, 24.6 (MeIPr / *o*-Ar, HClPr, MeIPr'), 1.07 / 147.1, 28.9, 23.4 (MeIPr' / *o*-Ar, HClPr, MeIPr).

<sup>1</sup>H, <sup>13</sup>C-GHSQC (600 MHz / 151 MHz, C<sub>7</sub>D<sub>8</sub>, 298 K): δ (<sup>1</sup>H) / δ (<sup>13</sup>C) = 7.16 / 131.5 (*p*-Ar / *p*-Ar), 7.00 / 125.0 (*m*-Ar / *m*-Ar), 2.80 / 28.9 (HClPr / HClPr), 1.53 / 15.7 (MeC / MeC), 1.11 / 23.4 (MeIPr / MeIPr), 1.07 / 24.6 (MeIPr' / MeIPr').

GCOSY (600 MHz / 600 MHz, C<sub>7</sub>D<sub>8</sub>, 298 K): δ (<sup>1</sup>H) / δ (<sup>1</sup>H) = 7.16 / 7.00 (*p*-Ar / *m*-Ar), 2.80 / 1.11 (HClPr / MeIPr), 2.80 / 1.07 (HClPr / MeIPr').

<sup>1</sup>H{NOE} NMR (600 MHz, C<sub>7</sub>D<sub>8</sub>, 298 K): δ (<sup>1</sup>H<sub>irr</sub>) / δ (<sup>1</sup>H<sub>res</sub>) = 7.16 / 7.00 (*p*-Ar / *m*-Ar), 7.00 / 7.16, 1.11, 1.07 (*m*-Ar / *p*-Ar, MeIPr, MeIPr'), 2.80 / 1.53, 1.11, 1.07 (HClPr / MeC, MeIPr, MeIPr'), 1.53 / 2.80, 1.11 (MeC / HClPr, MeIPr), 1.11 / 7.00, 2.80, 1.53, 1.07 (MeIPr / *m*-Ar, HClPr, MeC, MeIPr'), 1.07 / 7.00, 2.80, 1.11 (MeIPr' / *m*-Ar, HClPr, MeIPr).

1D TOCSY (500 MHz, CD<sub>2</sub>Cl<sub>2</sub>, 298 K): δ (<sup>1</sup>H<sub>irr</sub>) / δ (<sup>1</sup>H<sub>res</sub>) [ppm] = 7.16 / 7.00 (*p*-Ar / *m*-Ar), 7.00 / 7.16, 1.11, 1.07 (*m*-Ar / *p*-Ar, MeIPr, MeIPr'), 2.80 / 1.11, 1.07 (HClPr / MeIPr, MeIPr'), 1.11 / 2.80, 1.07 (MeIPr / HClPr, MeIPr'), 1.07 / 2.80, 1.11 (MeIPr' / HClPr, MeIPr).

<sup>19</sup>F NMR (564 MHz, C<sub>7</sub>D<sub>8</sub>, 298 K): δ/ppm = -132.4 (m, 4F, *o*-C<sub>6</sub>F<sub>5</sub><sup>B</sup>), -145.4 (m, 2F, *o*-C<sub>6</sub>F<sub>5</sub><sup>N</sup>), -151.3 (t, *J* = 21.9Hz, 1F, *p*-C<sub>6</sub>F<sub>5</sub><sup>N</sup>), -155.0 (t, *J* = 20.5Hz, 2F, *p*-C<sub>6</sub>F<sub>5</sub><sup>B</sup>), -159.8 (td, *J* = 22.3, 5.5 Hz, 2F, *m*-C<sub>6</sub>F<sub>5</sub><sup>N</sup>), -163.0 (td, *J* = 22.5, 8.4 Hz, 4F, *m*-C<sub>6</sub>F<sub>5</sub><sup>B</sup>).

<sup>19</sup>F, <sup>19</sup>F GCOSY (564 MHz, C<sub>7</sub>D<sub>8</sub>, 298 K): δ (<sup>19</sup>F) / δ (<sup>19</sup>F) = -132.4 / -163.0 (*o*-C<sub>6</sub>F<sub>5</sub><sup>B</sup> / *m*-C<sub>6</sub>F<sub>5</sub><sup>B</sup>), -145.4 / -159.8 (*o*-C<sub>6</sub>F<sub>5</sub><sup>N</sup> / *m*-C<sub>6</sub>F<sub>5</sub><sup>N</sup>), -151.3 / -159.8 (*p*-C<sub>6</sub>F<sub>5</sub><sup>N</sup> / *m*-C<sub>6</sub>F<sub>5</sub><sup>N</sup>), -155.0 / -163.0 (*p*-C<sub>6</sub>F<sub>5</sub><sup>B</sup> / *m*-C<sub>6</sub>F<sub>5</sub><sup>B</sup>).

<sup>11</sup>B{<sup>1</sup>H} NMR (192 MHz, C<sub>7</sub>D<sub>8</sub>, 298 K): δ/ppm = -10.01 (ν<sub>1/2</sub> ~ 210 Hz).

IR (KBr): ν/cm<sup>-1</sup> = 3073, 2871, 2933, 2874, 1752 (ν(C=O), s), 1646, 1560, 1478, 1388, 1338, 1287, 1233, 1094, 1072, 1037, 965, 882, 831, 804, 778, 763, 691, 667, 652, 604, 574, 555.

Elemental analysis (%) C<sub>33</sub>H<sub>20</sub>BF<sub>15</sub> N<sub>2</sub>O (M = 756.31 g/mol): calculated C 52.41, H 2.67, N 3.70; found C 53.04, H 3.01, N 3.33.

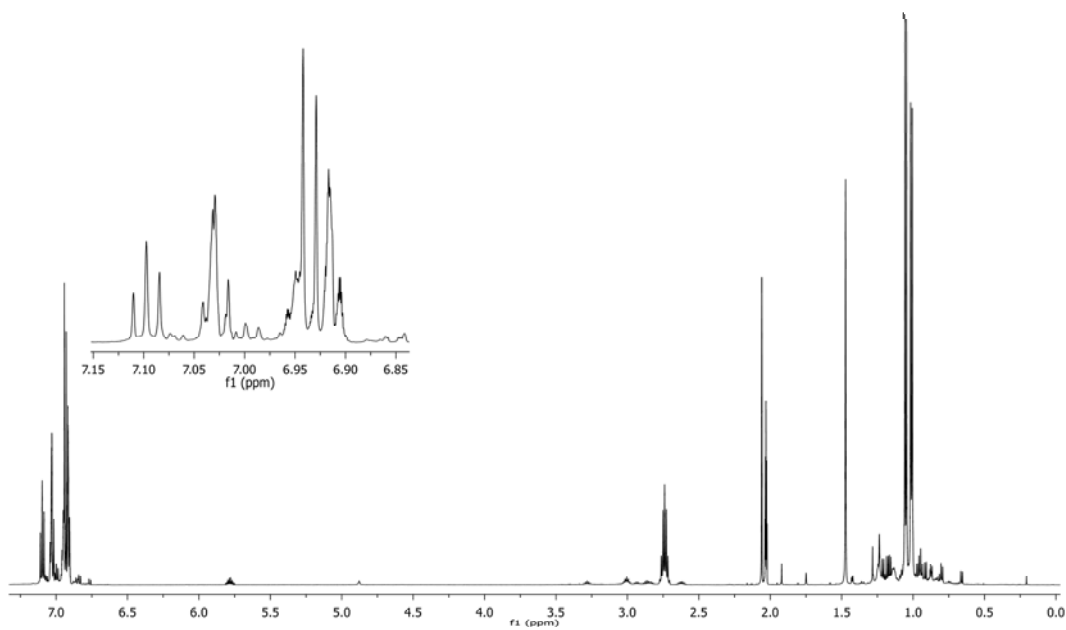

$^1\text{H}$  NMR (600 MHz,  $\text{C}_7\text{D}_8$ , 298 K)

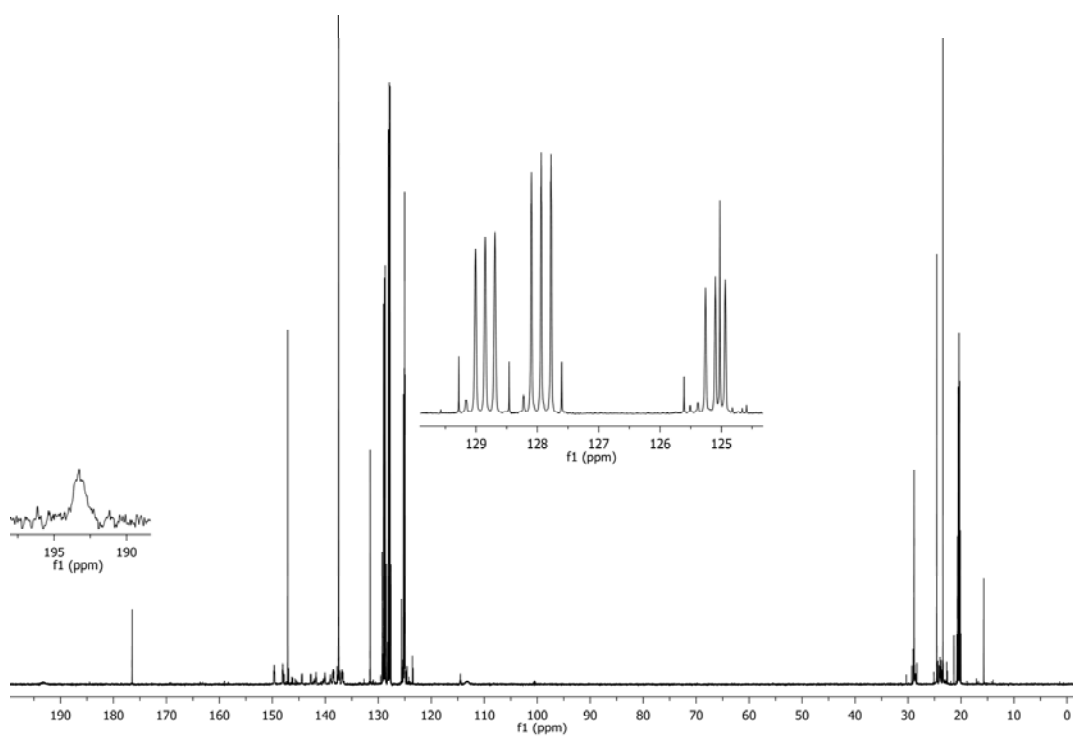

$^{13}\text{C}\{^1\text{H}\}$  NMR (151 MHz,  $\text{C}_7\text{D}_8$ , 298 K)

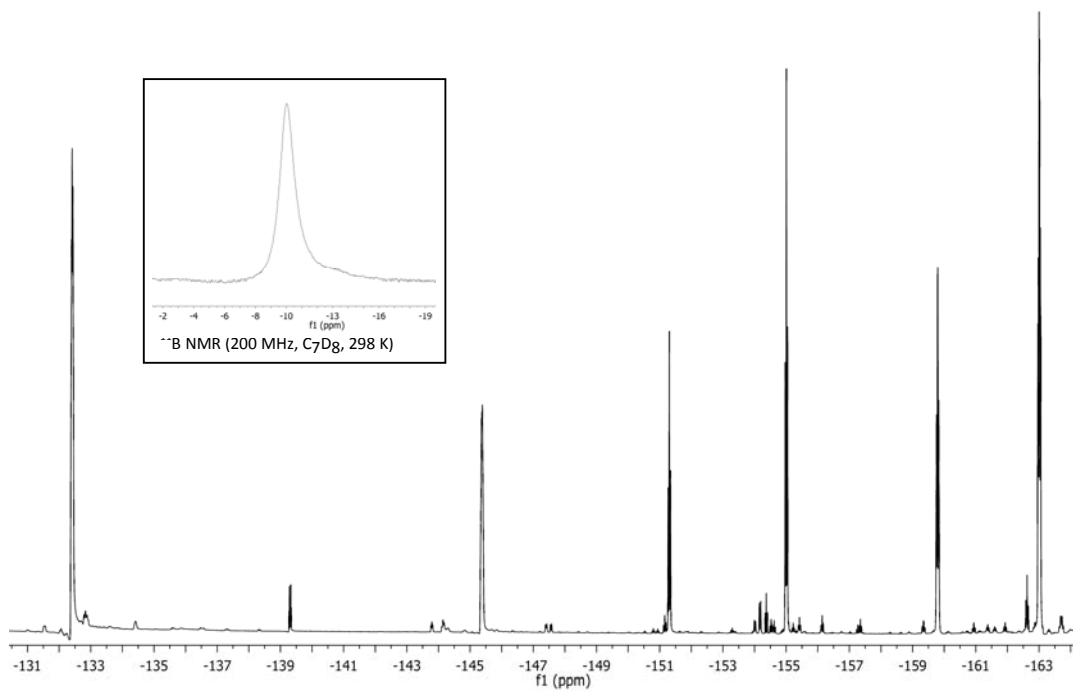

$^{19}\text{F}$  NMR (564 MHz,  $\text{C}_7\text{D}_8$ , 298 K)

**[N'-(2,6-diisopropylphenyl)-N-(4-cyanophenyl)acetimidamide](CO)bis(pentafluorophenyl)dehydroborate (**6b**)**

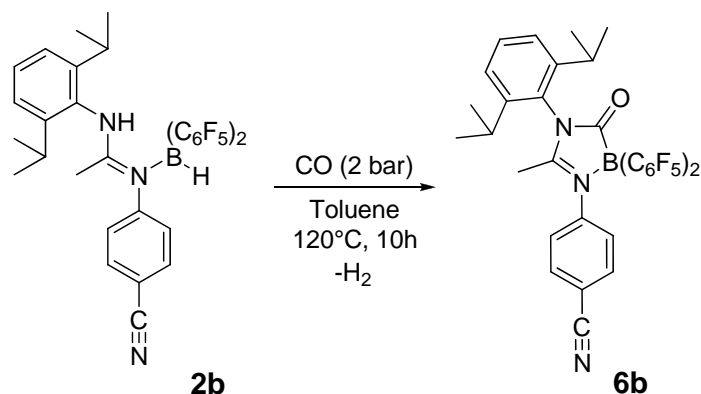

A solution of **2b** (180 mg; 0.27 mmol) in toluene (10 ml) was pressurized with 2 bar of CO and heated to 120°C for 10 hours. Then, the volatiles were removed in vacuum. Finally the greenyellow solid is recrystallized from cold toluene / pentane, given **6b** as a greenyellow crystalline material in 87% yield (163 mg, 0.24 mmol).

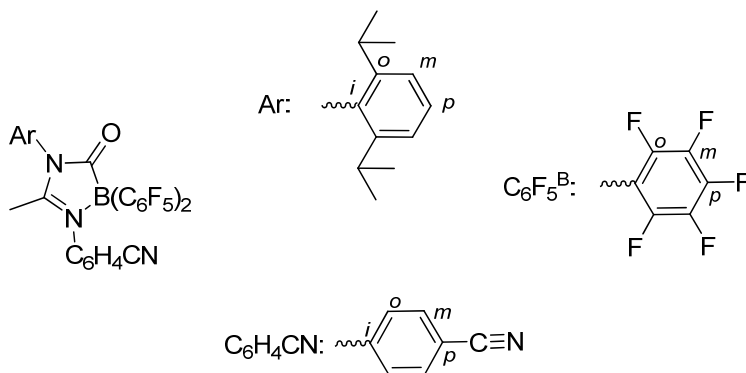

<sup>1</sup>H NMR (600 MHz, C<sub>7</sub>D<sub>8</sub>, 298 K): δ/ppm = 7.15 (t, *J* = 7.9Hz, 1H, *p*-Ar), 6.98 (d, *J* = 7.8Hz, 2H, *m*-Ar), 6.74 (d, *J* = 8.6Hz, 2H, *o*-C<sub>6</sub>H<sub>4</sub>CN), 6.71 (d, *J* = 8.7Hz, 2H, *m*-C<sub>6</sub>H<sub>4</sub>CN), 2.72 (hept, *J* = 6.73Hz, 2H, H*Ci*Pr), 1.48 (s, 3H, MeC), 1.11 (d, *J* = 6.9 Hz, 6H, Me*i*Pr), 1.01 (d, *J* = 6.7 Hz, 6H, Me*i*Pr').

<sup>13</sup>C{<sup>1</sup>H} NMR (151 MHz, C<sub>7</sub>D<sub>8</sub>, 298 K): δ/ppm = 193.9 (br., C=O), 172.2 (<sup>Ar-N</sup>C<sup>N-C<sub>6</sub>H<sub>4</sub>CN</sup>), 146.9 (*o*-Ar), 142.2 (*i*-C<sub>6</sub>H<sub>4</sub>CN), 133.5 (*o*-C<sub>6</sub>H<sub>4</sub>CN), 131.4 (*p*-Ar), 125.7 (*m*-C<sub>6</sub>H<sub>4</sub>CN), 124.9 (*m*-Ar), 124.8 (*i*-Ar), 117.2 (*p*-C<sub>6</sub>H<sub>4</sub>CN), 112.8 (C≡N), 29.0 (H*Ci*Pr), 24.5 (Me*i*Pr'), 23.3 (Me*i*Pr), 15.3 (MeC).

<sup>1</sup>H, <sup>13</sup>C-GHMBC (600 MHz / 151 MHz, C<sub>7</sub>D<sub>8</sub>, 298 K): δ (<sup>1</sup>H) / δ (<sup>13</sup>C) = 7.15 / 146.9 (*p*-Ar / *o*-Ar), 6.98 / 124.8, 29.0 (*m*-Ar / *i*-Ar, H*Ci*Pr), 6.74 / 142.2, 117.2 (*o*-C<sub>6</sub>H<sub>4</sub>CN / *i*-C<sub>6</sub>H<sub>4</sub>CN, *p*-C<sub>6</sub>H<sub>4</sub>CN),

6.71 / 112.8 (*m*-C<sub>6</sub>H<sub>4</sub>CN / C≡N), 1.48 / 172.2 (MeC / <sup>Ar-N</sup>C<sup>N-C<sub>6</sub>H<sub>4</sub>CN</sup>), 1.11 / 146.9, 29.0, 24.5 (MeiPr / *o*-Ar, HClPr, MeiPr'), 1.01 / 146.9, 29.0, 23.3 (MeiPr' / *o*-Ar, HClPr, MeiPr).

<sup>1</sup>H, <sup>13</sup>C-GHSQC (600 MHz / 151 MHz, C<sub>7</sub>D<sub>8</sub>, 298 K): δ (<sup>1</sup>H) / δ (<sup>13</sup>C) = 7.15 / 131.4 (*p*-Ar / *p*-Ar), 6.98 / 124.9 (*m*-Ar / *m*-Ar), 6.74 / 133.5 (*o*-C<sub>6</sub>H<sub>4</sub>CN / *o*-C<sub>6</sub>H<sub>4</sub>CN), 6.71 / 125.7 (*m*-C<sub>6</sub>H<sub>4</sub>CN / *m*-C<sub>6</sub>H<sub>4</sub>CN), 2.72 / 29.0 (HClPr / HClPr), 1.48 / 15.3 (MeC / MeC), 1.11 / 23.3 (MeiPr / MeiPr), 1.01 / 24.5 (MeiPr' / MeiPr').

GCOSY (600 MHz / 600 MHz, C<sub>7</sub>D<sub>8</sub>, 298 K): δ (<sup>1</sup>H) / δ (<sup>1</sup>H) = 7.15 / 6.98 (*p*-Ar / *m*-Ar), 6.74 / 6.71 (*o*-C<sub>6</sub>H<sub>4</sub>CN / *m*-C<sub>6</sub>H<sub>4</sub>CN), 2.72 / 1.11 (HClPr / MeiPr), 2.72 / 1.01 (HClPr / MeiPr').

<sup>1</sup>H{NOE} NMR (600 MHz, C<sub>7</sub>D<sub>8</sub>, 298 K): δ (<sup>1</sup>H<sub>irr</sub>) / δ (<sup>1</sup>H<sub>res</sub>) = 7.15 / 6.98 (*p*-Ar / *m*-Ar), 6.98 / 7.15, 1.11, 1.01 (*m*-Ar / *p*-Ar, MeiPr, MeiPr'), 6.74 / 6.71, 1.48 (*o*-C<sub>6</sub>H<sub>4</sub>CN / *m*-C<sub>6</sub>H<sub>4</sub>CN, MeC), 6.71 / 6.74, 1.48 (*m*-C<sub>6</sub>H<sub>4</sub>CN / *o*-C<sub>6</sub>H<sub>4</sub>CN, MeC), 1.48 / 6.71, 2.72, 1.11 (MeC / *m*-C<sub>6</sub>H<sub>4</sub>CN, HClPr, MeiPr), 1.11 / 6.98, 2.72, 1.48, 1.01 (MeiPr / *m*-Ar, HClPr, MeC, MeiPr'), 1.01 / 6.98, 2.72, 1.11 (MeiPr' / *m*-Ar, HClPr, MeiPr).

<sup>1</sup>D TOCSY (500 MHz, CD<sub>2</sub>Cl<sub>2</sub>, 298 K): δ (<sup>1</sup>H<sub>irr</sub>) / δ (<sup>1</sup>H<sub>res</sub>) [ppm] = 7.15 / 6.98, 1.48, 1.11, 1.01 (*p*-Ar / *m*-Ar, MeC, MeiPr, MeiPr'), 6.98 / 7.15, 1.48, 1.11, 1.01 (*m*-Ar / *p*-Ar, MeC, MeiPr, MeiPr'), 6.74 / 6.71 (*o*-C<sub>6</sub>H<sub>4</sub>CN / *m*-C<sub>6</sub>H<sub>4</sub>CN), 6.71 / 6.74 (*m*-C<sub>6</sub>H<sub>4</sub>CN / *o*-C<sub>6</sub>H<sub>4</sub>CN), 2.72 / 1.11, 1.01 (HClPr / MeiPr, MeiPr'), 1.11 / 6.98, 1.01 (MeiPr / *m*-Ar, MeiPr'), 1.01 / 1.01 (MeiPr' / MeiPr).

<sup>19</sup>F NMR (564 MHz, C<sub>7</sub>D<sub>8</sub>, 298 K): δ/ppm = -133.0 (d, *J* = 17.64Hz, 4F, *o*-C<sub>6</sub>F<sub>5</sub><sup>B</sup>), -155.3 (t, *J* = 20.5Hz, 2F, *p*-C<sub>6</sub>F<sub>5</sub><sup>B</sup>), -162.6 (m, 4F, *m*-C<sub>6</sub>F<sub>5</sub><sup>B</sup>).

<sup>19</sup>F, <sup>19</sup>F GCOSY (564 MHz, C<sub>7</sub>D<sub>8</sub>, 298 K): δ (<sup>19</sup>F) / δ (<sup>19</sup>F) = -133.0 / -162.6(*o*-C<sub>6</sub>F<sub>5</sub><sup>B</sup> / *m*-C<sub>6</sub>F<sub>5</sub><sup>B</sup>), -155.3 / -162.6 (*p*-C<sub>6</sub>F<sub>5</sub><sup>B</sup> / *m*-C<sub>6</sub>F<sub>5</sub><sup>B</sup>).

<sup>11</sup>B{<sup>1</sup>H} NMR (192 MHz, C<sub>7</sub>D<sub>8</sub>, 298 K): δ/ppm = -10.2 (ν<sub>1/2</sub> ~ 180 Hz).

IR (KBr): ν/cm<sup>-1</sup> = 3068, 2969, 2932, 2871, 2232 (ν(C≡N), s), 1758 (ν(C=O), s), 1669, 1646, 1567, 1518, 1467, 1411, 1387, 1320, 1288, 1232, 1194, 1175, 1098, 1069, 972, 841, 805, 777, 762, 711, 665, 577, 545.

Elemental analysis (%) C<sub>34</sub>H<sub>24</sub>BF<sub>10</sub>N<sub>3</sub>O (M = 691.37 g/mol): calculated C 59.07, H 3.50, N 6.08; found C 62.02, H 4.29, N 6.37.

**MS (ESI, Exact mass):** Calc: 714.175 ; Found: 714.172 [ $C_{34}H_{24}BF_{10}N_3ONa^+$ ]. Calc: 692.193 ; Found: 692.191 [ $C_{34}H_{24}BF_{10}N_3OH^+$ ].

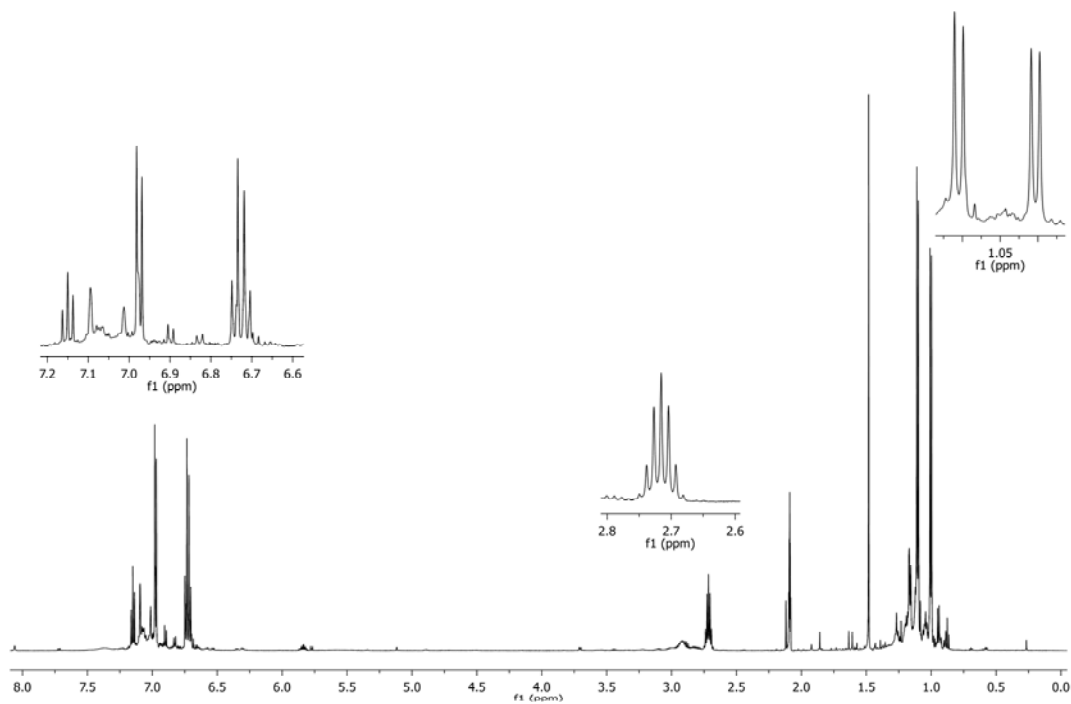

$^1H$  NMR (600 MHz,  $C_7D_8$ , 298 K)

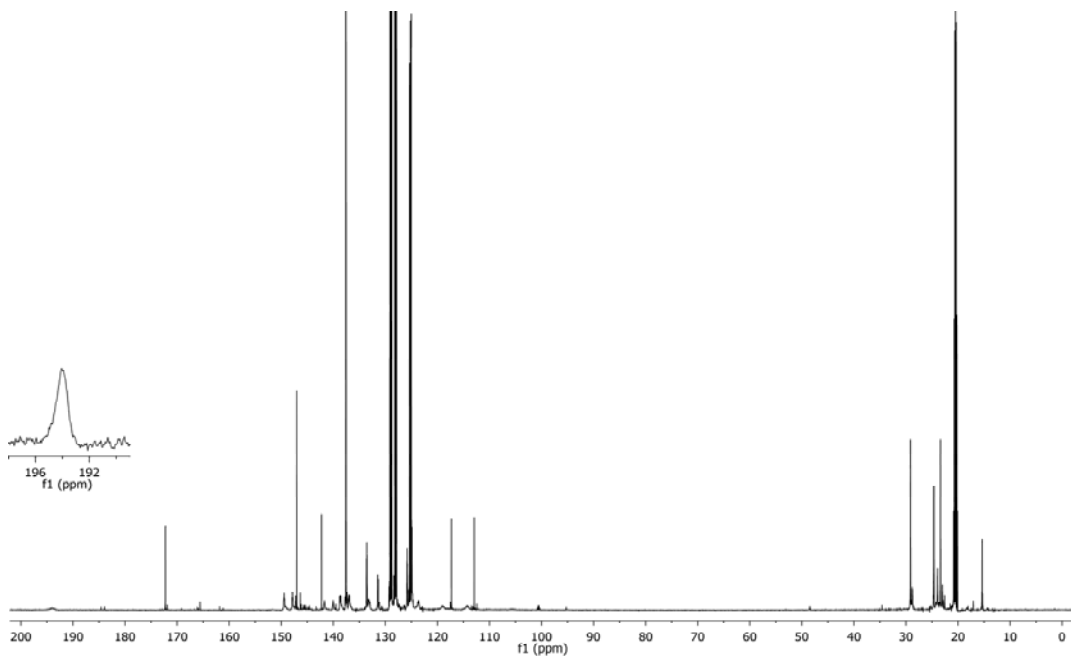

$^{13}C\{^1H\}$  NMR (151 MHz,  $C_7D_8$ , 298 K)

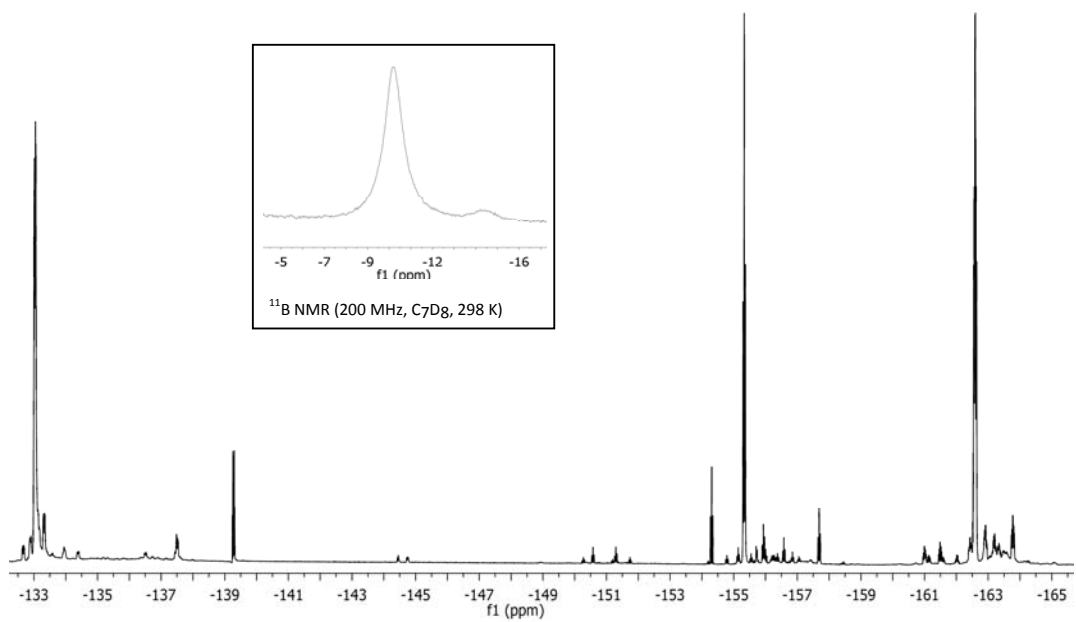

$^{19}\text{F}$  NMR (564 MHz,  $\text{C}_7\text{D}_8$ , 298 K)

## Phenylacetylene hydrogenation.

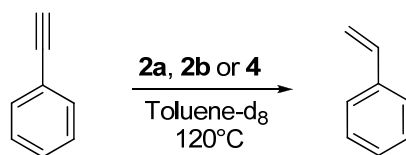

A solution of **2a**, **2b** or **4** (0.08 mmol) in toluene-d<sub>8</sub> (0.6 ml) was mixed with stoichiometric amounts of phenylacetylene inside a NMR Young tube under argon atmosphere. Then, the reaction mixture was heated to 120°C and the conversion to styrene was pursued in time intervals of 1 hour using <sup>1</sup>H NMR.

**Table S-1.** Hydrogenation of phenylacetylene by compounds **2a**, **2b** and **4**.<sup>[a]</sup>

|                                                         | Time (h) | Styrene yield (mg) | Conversion (%) |
|---------------------------------------------------------|----------|--------------------|----------------|
| <b>2a</b>                                               | 10       | 7.4                | 100            |
| <b>2b</b>                                               | 8        | 9.7                | 100            |
| <b>4 (2b-B(C<sub>6</sub>F<sub>5</sub>)<sub>3</sub>)</b> | 1        | 6.0                | 100            |

[a] C<sub>7</sub>D<sub>8</sub> as solvent, 120°C.

Monitoring by <sup>1</sup>H NMR revealed the production of styrene via appearance of a doublet doublet between 5.0 and 5.5 ppm along with the gradual decrease of the signal corresponding to the alkyne proton at 2.65 ppm (Figure S-1, S-2 and S-3). Also the production of the dehydrogenated cyclic compounds was observed showing the same pattern as seen in the synthesis of compounds **3** and **5**. Production of ethylbenzene (double hydrogenation of the triple bond) could not be observed, nor a resonance for molecular hydrogen.



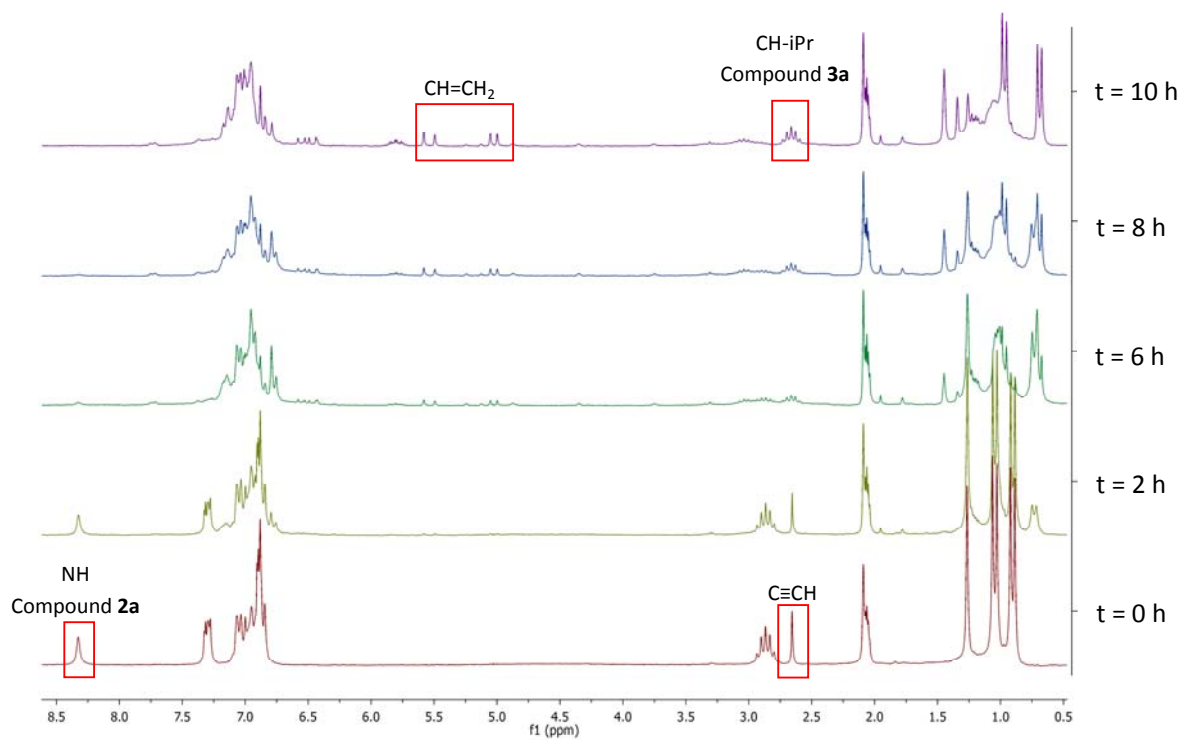

**Figure S-1.** Phenylacetylene hydrogenation using compound **2a**.

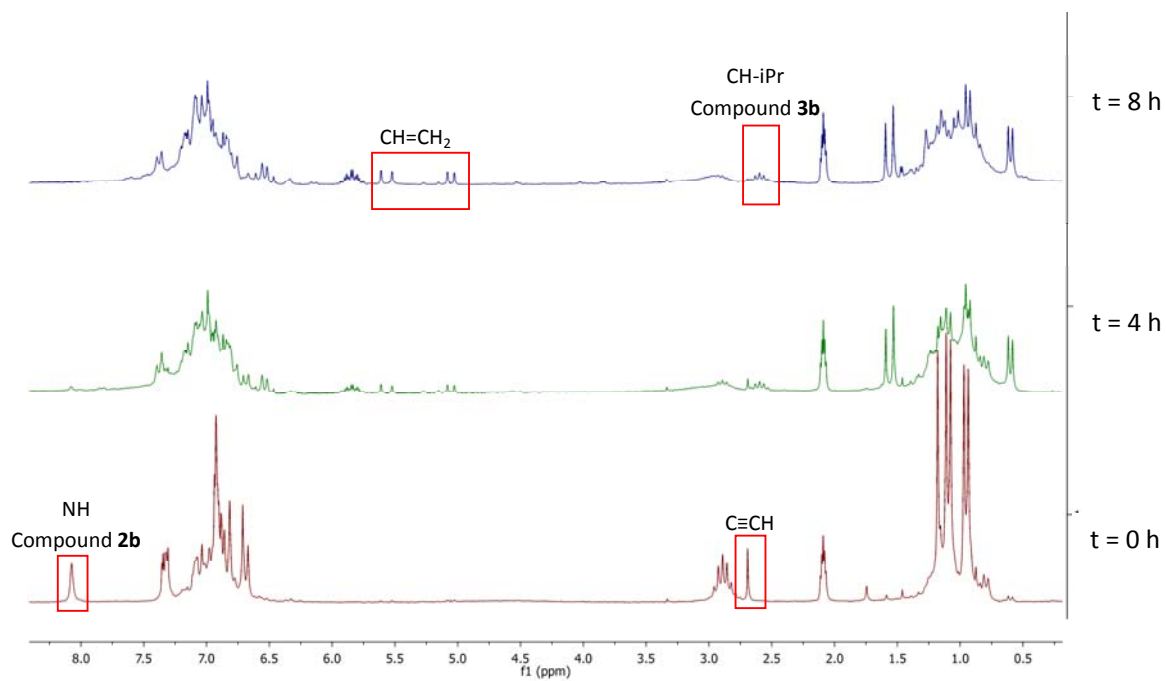

**Figure S-2.** Phenylacetylene hydrogenation using compound **2b**.

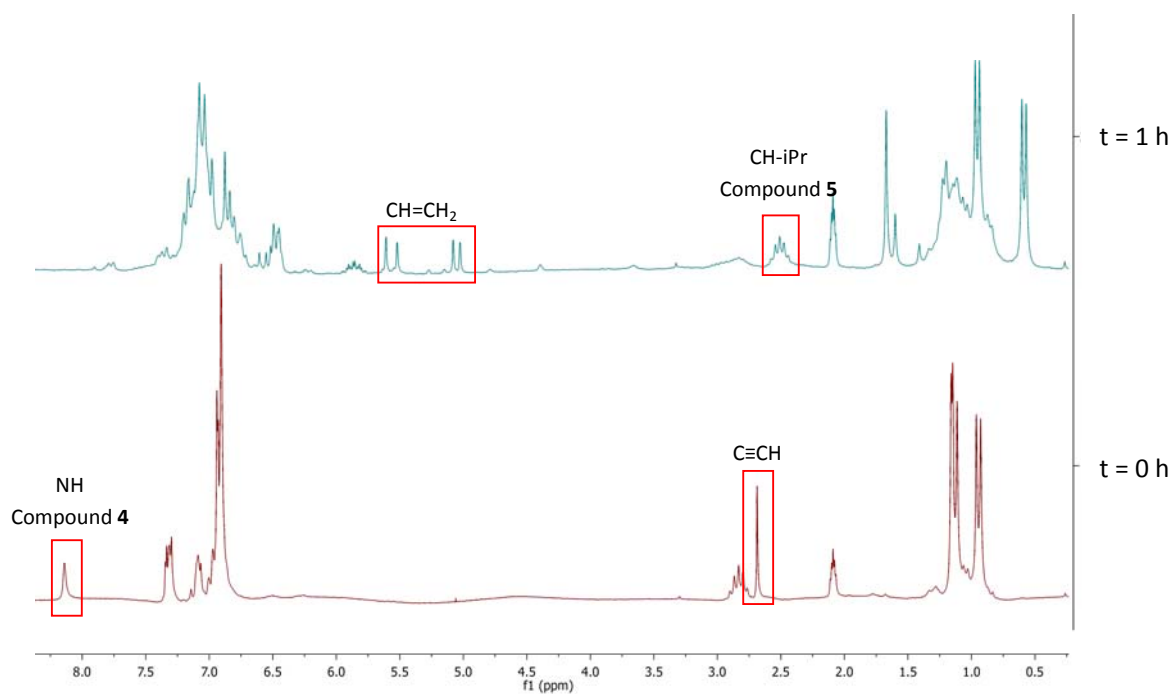

**Figure S-3.** Phenylacetylene hydrogenation using compound **4**.

[1] R.T. Boéré, V. Klassen, G. Wolmershäuser, *J. Chem. Soc., Dalton Trans.* **1998**, 4147.

[2] B.C. Peoples, G. De la Vega, C. Valdebenito, R. Quijada, A. Ibañez, M. Valderrama, R. Rojas, *J. Organomet. Chem.* **2012**, 700, 147.
